# Supplementary material for: NiFe2O4@SiO2@PrNH2–DPA–CeCl3: a cerium-based magnetic nano dual-acid catalyst with high efficacy and recyclability for domino sequential synthesis of lactam ring-fused 1,5-benzodiazepines
Source: Royal Society of Chemistry journal article supplement (doi:10.1039/d2cy01778d), 2023-01-01
Supplement: d2cy01778d1.pdf [file d2cy01778d1.pdf]

## Supporting Information for

**NiFe<sub>2</sub>O<sub>4</sub>@SiO<sub>2</sub>@PrNH<sub>2</sub>-DPA-CeCl<sub>3</sub>: a cerium-based magnetic nano dual-acid catalyst with high efficacy and recyclability for domino sequential synthesis of lactam ring-fused 1,5-benzodiazepines**

Xiao Zhang, Fan Bai, Miaomiao Li, Huihui Ru and Lanzhi Wang \*

*Hebei Key Laboratory of Organic Functional Molecules, College of Chemistry and Material Science, Hebei Normal University, Shijiazhuang, Hebei, 050024, PR China  
Email address: wanglanzhi@126.com (Lanzhi Wang)*

## Content

|                                                                                                       |    |
|-------------------------------------------------------------------------------------------------------|----|
| <b>Table 1</b> Crystal data and structural refinement details for compound <b>4dad</b> .....          | 3  |
| Spectral data of the synthesized compound <b>4aaa-4dae</b> .....                                      | 4  |
| <sup>1</sup> H NMR and <sup>13</sup> C NMR spectra of the synthesized compound <b>4aaa-4dae</b> ..... | 11 |
| IR spectra of the synthesized compound <b>4aaa-4dae</b> .....                                         | 31 |
| MS spectra of the synthesized compound <b>4aaa-4dae</b> .....                                         | 41 |

**Table 1** Crystal data and structural refinement details for compound **4dad**.

|                                                                  |                                                                               |
|------------------------------------------------------------------|-------------------------------------------------------------------------------|
| Compound                                                         | 4dad                                                                          |
| Empirical formula                                                | C <sub>20</sub> H <sub>21</sub> Br <sub>2</sub> N <sub>3</sub> O <sub>2</sub> |
| Formula weight                                                   | 495.22                                                                        |
| Crystal system                                                   | Monoclinic                                                                    |
| Space group                                                      | <i>P</i> 2 <sub>1</sub> / <i>c</i>                                            |
| <i>a</i> (Å)                                                     | 10.7492(9)                                                                    |
| <i>b</i> (Å)                                                     | 21.4852(19)                                                                   |
| <i>c</i> (Å)                                                     | 8.9772(6)                                                                     |
| $\alpha, \beta, \gamma$ (°)                                      | 90, 94.765(3), 90                                                             |
| Volume (Å <sup>3</sup> )                                         | 2066.1(3)                                                                     |
| <i>Z</i>                                                         | 4                                                                             |
| Density(calculated) (Mg·m <sup>-3</sup> )                        | 1.592                                                                         |
| Absorption coefficient (mm <sup>-1</sup> )                       | 3.943                                                                         |
| <i>F</i> <sub>(000)</sub>                                        | 992                                                                           |
| Crystal size (mm <sup>3</sup> )                                  | 0.38 × 0.15 × 0.11                                                            |
| $\vartheta$ (°)                                                  | 2.12 to 25.02                                                                 |
| Reflections collected                                            | 9916                                                                          |
| Independent reflections ( <i>R</i> <sub>(int)</sub> )            | 3630 [ <i>R</i> <sub>int</sub> = 0.0839, <i>R</i> <sub>sigma</sub> = 0.0908]  |
| Data / restraints / parameters                                   | 3630/0/246                                                                    |
| Goodness-of-fit on <i>F</i> <sup>2</sup>                         | 1.056                                                                         |
| Final <i>R</i> indices [ <i>I</i> > 2σ( <i>I</i> )] <sup>a</sup> | <i>R</i> <sub>1</sub> = 0.0675, <i>wR</i> <sub>2</sub> = 0.1806               |
| <i>R</i> indices (all data)                                      | <i>R</i> <sub>1</sub> = 0.1239, <i>wR</i> <sub>2</sub> = 0.2001               |
| CCDC                                                             | 2212904                                                                       |

<sup>a</sup>  $R_1 = \sum ||F_o| - |F_c|| / \sum |F_o|$ ;  $wR_2 = \{\sum [w(F_o^2 - F_c^2)^2] / \sum [w(F_o^2)^2]\}^{1/2}$ .

Spectral data of the synthesized compound **4aaa-4dae**

**11-phenyl-2,3,4,5,10,11-hexahydro-1H-benzo[b]pyrido[4,3-e][1,4]diazepine-1-one (4aaa)**

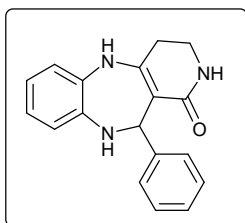

Creamy yellow solid; 95%; m.p.: 203-204 °C; IR (KBr): 3402, 3314, 3076, 1652, 1548, 1244  $\text{cm}^{-1}$ ;  $^1\text{H}$  NMR (400 MHz,  $\text{DMSO-}d_6$ , TMS):  $\delta$  3.3 ( $\text{DMSO-}d_6$ ),  $\delta$  2.70 – 2.61 (2H, m,  $\text{CH}_2$ ), 3.29 (2H, t,  $J = 6.0$  Hz,  $\text{CH}_2$ ), 5.65 (1H, d,  $J = 5.6$  Hz, CH), 6.10 (1H, d,  $J = 5.8$  Hz, NH), 6.56 – 6.50 (3H, m, Ph), 6.77 (1H, s, NH), 6.86 – 6.82 (1H, m, Ph), 7.01 (1H, t,  $J = 6.5$  Hz, Ph), 7.16 – 7.10 (4H, m, Ph), 8.37 (1H, s, NH) ppm;  $^{13}\text{C}$  NMR (100 MHz,  $\text{DMSO-}d_6$ , TMS):  $\delta$  30.3, 38.6, 57.7, 102.4, 119.6, 120.1, 121.3, 122.0, 126.2, 127.9, 128.1, 132.5, 138.4, 145.7, 148.3, 168.4 ppm; MS calcd for  $\text{C}_{18}\text{H}_{17}\text{N}_3\text{O}$  291.14, found 292.10 ( $M + 1$ ); Anal. calcd (%) for  $\text{C}_{18}\text{H}_{17}\text{N}_3\text{O}$ : C 74.20, H 5.88, N 14.42; found: C 74.21, H 5.86, N 14.43.

**11-(p-tolyl)-2,3,4,5,10,11-hexahydro-1H-benzo[b]pyrido[4,3-e][1,4]diazepine-1-one (4aab)**

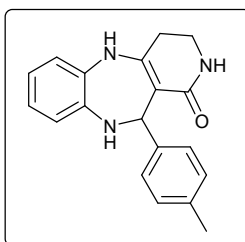

Brown solid; 93%; m.p.: 196-198 °C; IR (KBr): 3402, 3314, 3076, 1652, 1548, 1244  $\text{cm}^{-1}$ ; 3407, 3303, 3081, 1658, 1554, 1248  $\text{cm}^{-1}$ ;  $^1\text{H}$  NMR (400 MHz,  $\text{DMSO-}d_6$ , TMS):  $\delta$  3.3 ( $\text{DMSO-}d_6$ ),  $\delta$  2.13 (3H, s,  $\text{CH}_3$ ), 2.70 – 2.59 (2H, m,  $\text{CH}_2$ ), 3.26 (2H, s,  $\text{CH}_2$ ), 5.59 (1H, d,  $J = 5.2$  Hz, CH), 6.03 (1H, d,  $J = 5.6$  Hz, NH), 6.51 (3H, t,  $J = 7.2$  Hz, Ph), 6.75 (1H, s, NH), 6.86 – 6.81 (1H, m, Ph), 6.95 (4H, dd,  $J = 44.1, 7.7$  Hz, Ph), 8.40 (1H, s, NH) ppm;  $^{13}\text{C}$  NMR (100 MHz,  $\text{DMSO-}d_6$ , TMS):  $\delta$  21.0, 30.3, 38.6, 57.3, 102.6, 119.6, 120.0, 121.2, 122.0, 127.8, 128.7, 132.5, 134.9, 138.5, 142.6, 148.2, 168.4 ppm; MS calcd for  $\text{C}_{19}\text{H}_{19}\text{N}_3\text{O}$  305.15, found 306.10 ( $M + 1$ ); Anal. calcd (%) for  $\text{C}_{19}\text{H}_{19}\text{N}_3\text{O}$ : C 74.73, H 6.27, N 13.76; found: C 74.72, H 6.25, N 13.76.

**11-(4-chlorophenyl)-2,3,4,5,10,11-hexahydro-1H-benzo[b]pyrido[4,3-e][1,4]diazepine-1-one (4aac)**

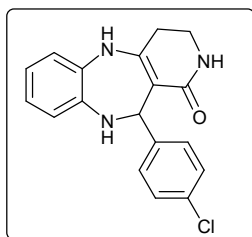

Apricot solid; 96%; m.p.: 213-215 °C; IR (KBr): 3407, 3308, 3077, 1652, 1559, 1249 cm<sup>-1</sup>; <sup>1</sup>H NMR (400 MHz, DMSO-*d*<sub>6</sub>, TMS): δ 3.3 (DMSO-*d*<sub>6</sub>), δ 2.67 (2H, dt, *J* = 14.7, 8.5 Hz, CH<sub>2</sub>), 3.27 (2H, s, CH<sub>2</sub>), 5.62 (1H, d, *J* = 5.3 Hz, CH), 6.12 (1H, d, *J* = 5.5 Hz, NH), 6.50 (1H, s, Ph), 6.58 – 6.53 (2H, m, Ph), 6.80 (1H, s, NH), 6.89 – 6.85 (1H, m, Ph),

7.18 – 7.12 (4H, m, Ph), 8.49 (1H, s, NH) ppm; <sup>13</sup>C NMR (100 MHz, DMSO-*d*<sub>6</sub>, TMS): δ 30.2, 38.5, 57.2, 101.8, 119.8, 120.3, 121.3, 122.2, 128.1, 129.7, 130.7, 132.6, 138.2, 144.6, 148.6, 168.3 ppm; MS calcd for C<sub>18</sub>H<sub>16</sub>ClN<sub>3</sub>O 325.10, found 326.10 (M + 1); Anal. calcd (%) for C<sub>18</sub>H<sub>16</sub>ClN<sub>3</sub>O: C 66.36, H 4.95, N 12.90; found: C 66.34, H 4.96, N 12.92.

**11-(4-bromophenyl)-2,3,4,5,10,11-hexahydro-1H-benzo[b]pyrido[4,3-e][1,4]diazepine-1-one (4aad)**

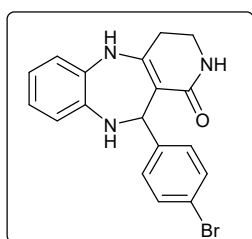

Milk white solid; 96%; m.p.: 234-235 °C; IR (KBr): 3408, 3306, 3082, 1652, 1553, 1243 cm<sup>-1</sup>; <sup>1</sup>H NMR (400 MHz, DMSO-*d*<sub>6</sub>, TMS): δ 3.3 (DMSO-*d*<sub>6</sub>), δ 2.69 – 2.58 (2H, m, CH<sub>2</sub>), 3.26 (2H, t, *J* = 5.9 Hz, CH<sub>2</sub>), 5.60 (1H, d, *J* = 5.7 Hz, CH), 6.11 (1H, d, *J* = 5.9 Hz, NH), 6.51 – 6.47 (1H, m, Ph), 6.55 (2H, dd, *J* = 8.8, 5.2 Hz, Ph), 6.79 (1H, s, NH), 6.86 – 6.82 (1H, m, Ph), 7.08 (2H, d, *J* = 8.3 Hz, Ph), 7.30 (2H, d, *J* = 8.2 Hz, Ph), 8.41

(1H, s, NH) ppm; <sup>13</sup>C NMR (100 MHz, DMSO-*d*<sub>6</sub>, TMS): δ 30.2, 38.5, 57.3, 101.8, 119.3, 119.73, 120.4, 121.3, 122.2, 130.1, 131.0, 132.6, 138.1, 145.0, 148.5, 168.2 ppm; MS calcd for C<sub>18</sub>H<sub>16</sub>BrN<sub>3</sub>O 369.05, found 370.10 (M + 1); Anal. calcd (%) for C<sub>18</sub>H<sub>16</sub>BrN<sub>3</sub>O: C 58.39, H 4.36, N 11.35; found: C 58.43, H 4.34, N 11.32.

**8-methyl-11-phenyl-2,3,4,5,10,11-hexahydro-1H-benzo[b]pyrido[4,3-e][1,4]diazepine-1-one (4baa)**

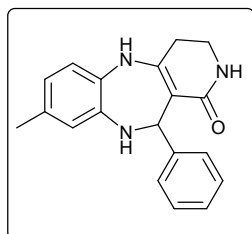

Milky solid; 94%; m.p.: 185-186 °C; IR (KBr): 3411, 3308, 3076, 1642, 1553, 1233 cm<sup>-1</sup>; <sup>1</sup>H NMR (400 MHz, DMSO-*d*<sub>6</sub>, TMS): δ 3.3 (DMSO-*d*<sub>6</sub>), δ 1.99 (3H, s, CH<sub>3</sub>), 2.65 – 2.58 (2H, m, CH<sub>2</sub>), 3.24 (2H, d, *J* = 5.9 Hz, CH<sub>2</sub>), 5.62 (1H, d, *J* = 5.6 Hz, CH), 5.99 (1H, d, *J* = 5.7 Hz, NH), 6.30 (1H, s, Ph), 6.34 (1H, d, *J* = 8.0 Hz, Ph), 6.71 (2H, d, *J* = 8.1 Hz, Ph), 7.00 (1H, t, *J* = 6.3 Hz, NH), 7.12 (4H, d, *J* = 6.5 Hz, Ph), 8.28 (1H, s, NH) ppm; <sup>13</sup>C

NMR (100 MHz, DMSO-*d*<sub>6</sub>, TMS): δ 20.5, 30.2, 38.4, 57.3, 101.7, 119.4, 120.6, 121.3, 126.0, 127.7, 128.0, 129.8, 130.5, 138.0, 145.5, 148.1, 168.2 ppm; MS calcd for C<sub>19</sub>H<sub>19</sub>N<sub>3</sub>O 305.15, found 306.10 (M + 1); Anal. calcd (%) for C<sub>19</sub>H<sub>19</sub>N<sub>3</sub>O: C 74.73, H 6.27, N 13.76; found: C 74.72, H 6.23, N 13.76.

**8-methyl-11-(p-tolyl)-2,3,4,5,10,11-hexahydro-1H-benzo[b]pyrido[4,3-e][1,4]diazepine-1-one (4bab)**

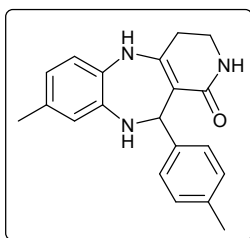

Apricot solid; 96%; m.p.: 185-186 °C; IR (KBr): 3614, 3308, 3076, 1657, 1554, 1243  $\text{cm}^{-1}$ ;  $^1\text{H}$  NMR (400 MHz,  $\text{DMSO-}d_6$ , TMS):  $\delta$  3.3 ( $\text{DMSO-}d_6$ ),  $\delta$  1.99 (3H, s,  $\text{CH}_3$ ), 2.14 (3H, s,  $\text{CH}_3$ ), 2.63-2.57 (2H, m,  $\text{CH}_2$ ), 3.24 (2H, t,  $J = 5.6$  Hz,  $\text{CH}_2$ ), 5.58 (1H, d,  $J = 1.5$  Hz, CH), 5.97 (1H, d,  $J = 0.5$  Hz, NH), 6.30 (1H, s, Ph), 6.34 (1H, d,  $J = 8.0$  Hz, Ph), 6.69 (1H, s, Ph), 6.71 (1H, s, NH), 6.91 (2H, d,  $J = 7.8$  Hz, Ph), 7.01 (2H, d,  $J = 7.8$  Hz, Ph), 8.26 (1H, s, NH) ppm;  $^{13}\text{C}$  NMR (100 MHz,  $\text{DMSO-}d_6$ , TMS):  $\delta$  20.7, 21.0, 30.3, 38.6, 57.2, 102.1, 119.5, 120.7, 121.4, 127.8, 128.8, 130.0, 130.5, 135.0, 138.2, 142.7, 148.1, 168.3 ppm; MS calcd for  $\text{C}_{20}\text{H}_{21}\text{N}_3\text{O}$  319.17, found 320.10 ( $M + 1$ ); Anal. calcd (%) for  $\text{C}_{20}\text{H}_{21}\text{N}_3\text{O}$ : C 75.21, H 6.62, N 13.16; found: C 75.20, H 6.58, N 13.16.

**11-(4-chlorophenyl)-8-methyl-2,3,4,5,10,11-hexahydro-1H-benzo[b]pyrido[4,3-e][1,4]diazepine-1-one (4bac)**

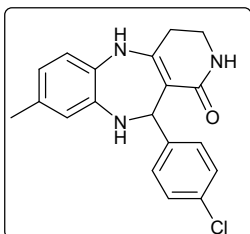

Apricot solid; 97%; m.p.: 193-194 °C; IR (KBr): 3604, 3080, 1657, 1553, 1209  $\text{cm}^{-1}$ ;  $^1\text{H}$  NMR (400 MHz,  $\text{DMSO-}d_6$ , TMS):  $\delta$  3.3 ( $\text{DMSO-}d_6$ ),  $\delta$  2.01 (3H, s,  $\text{CH}_3$ ), 2.61 (2H, m,  $J = 14.7, 7.1$  Hz,  $\text{CH}_2$ ), 3.24 (2H, d,  $J = 6.2$  Hz,  $\text{CH}_2$ ), 5.59 (1H, d,  $J = 5.7$  Hz, CH), 6.03 (1H, d,  $J = 5.8$  Hz, NH), 6.29 (1H, s, Ph), 6.36 (1H, s, Ph), 6.74-6.71 (2H, m, NH, Ph), 7.17 (4H, t,  $J = 9.2$  Hz, Ph), 8.33 (1H, s, NH) ppm;  $^{13}\text{C}$  NMR (100 MHz,  $\text{DMSO-}d_6$ , TMS):  $\delta$  20.7, 30.3, 38.5, 57.0, 101.4, 119.7, 121.0, 121.4, 128.1, 129.7, 130.0, 130.7, 130.9, 137.9, 144.7, 148.5, 168.2 ppm; MS calcd for  $\text{C}_{19}\text{H}_{18}\text{ClN}_3\text{O}$  339.11, found 340.10 ( $M + 1$ ); Anal. calcd (%) for  $\text{C}_{19}\text{H}_{18}\text{ClN}_3\text{O}$ : C 67.16, H 5.34, N 12.37; found: C 67.20, H 5.33, N 12.39.

**11-(4-bromophenyl)-8-methyl-2,3,4,5,10,11-hexahydro-1H-benzo[b]pyrido[4,3-e][1,4]diazepine-1-one (4bad)**

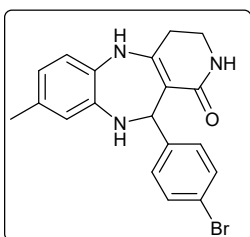

Powder white solid; 98%; m.p.: 214-215°C; IR (KBr): 3623, 3407, 3062, 1658, 1558, 1214  $\text{cm}^{-1}$ ;  $^1\text{H}$  NMR (400 MHz,  $\text{DMSO-}d_6$ , TMS):  $\delta$  3.3 ( $\text{DMSO-}d_6$ ),  $\delta$  2.01 (3H, s,  $\text{CH}_3$ ), 2.65-2.56 (2H, m,  $\text{CH}_2$ ), 3.25 (2H, s,  $\text{CH}_2$ ), 5.57 (1H, d,  $J = 5.3$  Hz, CH), 6.03 (1H, d,  $J = 5.4$  Hz, NH), 6.29 (1H, s, Ph), 6.37 (1H, d,  $J = 6.6$  Hz, Ph), 6.74 (2H, t,  $J = 8.5$  Hz, NH, Ph), 7.07 (2H, d,  $J = 8.0$  Hz, Ph), 7.31 (2H, d,  $J = 8.1$  Hz, Ph), 8.34 (1H, s, NH) ppm;  $^{13}\text{C}$  NMR (100 MHz,  $\text{DMSO-}d_6$ , TMS):  $\delta$  20.7, 30.2, 38.5, 57.1, 101.3, 119.3, 119.8, 121.0, 121.4, 130.0, 130.2, 130.9, 131.0, 137.9, 145.1, 148.6, 168.3 ppm; MS calcd for  $\text{C}_{19}\text{H}_{18}\text{BrN}_3\text{O}$  383.06, found 384.10 ( $M + 1$ ); Anal. calcd (%) for  $\text{C}_{19}\text{H}_{18}\text{BrN}_3\text{O}$ : C 59.39, H 4.72, N 10.94; found: C 59.42, H 4.70, N 10.96.

**8-chloro-11-phenyl-2,3,4,5,10,11-hexahydro-1H-benzo[b]pyrido[4,3-e][1,4]diazepin-1-one (4caa)**

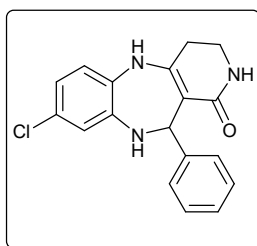

Milk white solid; 93%; m.p.: 246-248°C; IR (KBr): 3358, 3303, 3082, 1651, 1559, 1254  $\text{cm}^{-1}$ ;  $^1\text{H}$  NMR (400 MHz,  $\text{DMSO-}d_6$ , TMS):  $\delta$  3.3 ( $\text{DMSO-}d_6$ ),  $\delta$  2.61 (2H, dd,  $J = 14.2, 7.1$  Hz,  $\text{CH}_2$ ), 3.26 (2H, d,  $J = 6.0$  Hz,  $\text{CH}_2$ ), 5.64 (1H, d,  $J = 5.7$  Hz, CH), 6.37 (1H, d,  $J = 5.8$  Hz, NH), 6.59-6.54 (2H, m, Ph), 6.82 (2H, d,  $J = 9.0$  Hz, Ph), 7.03 (1H, t,  $J = 6.4$  Hz, NH), 7.18-7.12 (4H, m, Ph), 8.49 (1H, s, NH) ppm;  $^{13}\text{C}$  NMR (100 MHz,  $\text{DMSO-}d_6$ , TMS):  $\delta$  30.1, 38.5, 57.5, 102.7, 119.6, 120.0, 120.8, 125.2, 126.5, 127.8, 128.4, 131.7, 139.9, 145.0, 148.0, 168.1 ppm; MS calcd for  $\text{C}_{18}\text{H}_{16}\text{ClN}_3\text{O}$  325.10, found 326.20 ( $M + 1$ ); Anal. calcd (%) for  $\text{C}_{18}\text{H}_{16}\text{ClN}_3\text{O}$ : C 66.36, H 4.95, N 12.90; found: C 66.34, H 4.92, N 12.92.

**8-chloro-11-(p-tolyl)-2,3,4,5,10,11-hexahydro-1H-benzo[b]pyrido[4,3-e][1,4]diazepine-1-one (4cab)**

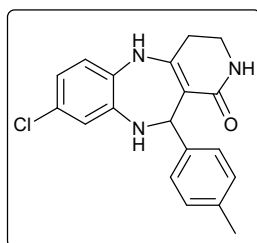

Cream yellow solid; 91%; m.p.: 183-185°C; IR (KBr): 3618, 3313, 3018, 1652, 1548, 1259  $\text{cm}^{-1}$ ;  $^1\text{H}$  NMR (400 MHz,  $\text{DMSO-}d_6$ , TMS):  $\delta$  3.3 ( $\text{DMSO-}d_6$ ),  $\delta$  2.16 (3H, s,  $\text{CH}_3$ ), 2.62 (2H, d,  $J = 4.8$  Hz,  $\text{CH}_2$ ), 3.26 (2H, s,  $\text{CH}_2$ ), 5.60 (1H, d,  $J = 3.9$  Hz, CH), 6.34 (1H, d,  $J = 4.6$  Hz, NH), 6.55 (2H, s, Ph), 6.82 (2H, s, NH, Ph), 6.98 (4H, dd,  $J = 26.0, 7.1$  Hz, Ph), 8.47 (1H, s, NH) ppm;  $^{13}\text{C}$  NMR (100 MHz,  $\text{DMSO-}d_6$ , TMS):  $\delta$  21.0, 30.1, 38.5, 57.2, 102.9, 119.5, 120.0, 120.7, 125.1, 127.7, 129.0, 131.7, 135.3, 140.0, 142.1, 147.9, 168.1 ppm; MS calcd for  $\text{C}_{19}\text{H}_{18}\text{ClN}_3\text{O}$  339.11, found 340.20 ( $M + 1$ ); Anal. calcd (%) for  $\text{C}_{19}\text{H}_{18}\text{ClN}_3\text{O}$ : C 67.16, H 5.34, N 12.37; found: C 67.21, H 5.31, N 12.39.

**8-chloro-11-(4-chlorophenyl)-2,3,4,5,10,11-hexahydro-1H-benzo[b]pyrido[4,3-e][1,4]diazepine-1-one (4cac)**

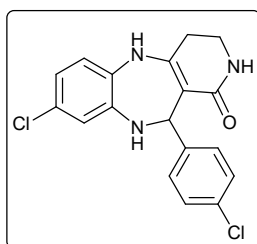

Milky solid; 94%; m.p.: 184-185°C; IR (KBr): 3603, 3076, 1667, 1555, 1258  $\text{cm}^{-1}$ ;  $^1\text{H}$  NMR (400 MHz,  $\text{DMSO-}d_6$ , TMS):  $\delta$  3.3 ( $\text{DMSO-}d_6$ ),  $\delta$  2.63 (2H, q,  $J = 15.9$  Hz,  $\text{CH}_2$ ), 3.28 (2H, s,  $\text{CH}_2$ ), 5.62 (1H, d,  $J = 3.0$  Hz, CH), 6.41 (1H, d,  $J = 3.7$  Hz, NH), 6.56 (1H, s, Ph), 6.60 (1H, d,  $J = 8.4$  Hz, Ph), 6.91 – 6.83 (2H, m, NH, Ph), 7.18 (4H, dd,  $J = 33.0, 7.7$  Hz, Ph), 8.55 (1H, s, NH) ppm;  $^{13}\text{C}$  NMR (100 MHz,  $\text{DMSO-}d_6$ , TMS):  $\delta$  30.1, 38.4, 57.0, 102.17, 119.9, 120.0, 120.9, 125.4, 128.5, 129.6, 131.1, 131.7, 139.6, 144.1, 148.3, 168.0 ppm; MS calcd for  $\text{C}_{18}\text{H}_{15}\text{Cl}_2\text{N}_3\text{O}$  359.06, found 359.90 ( $M + 1$ ); Anal. calcd (%) for  $\text{C}_{18}\text{H}_{15}\text{Cl}_2\text{N}_3\text{O}$ : C 60.02, H 4.20, N 11.66; found: C 60.06, H 4.18, N 11.70.

**11-(4-bromophenyl)-8-chloro-2,3,4,5,10,11-hexahydro-1H-benzo[b]pyrido[4,3-e][1,4]diazepine-1-one (4cad)**

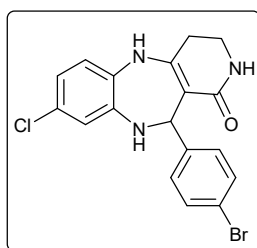

Off-white solid; 94%; m.p.: 187-189°C; IR (KBr): 3608, 3087, 1672, 1554, 1258  $\text{cm}^{-1}$ ;  $^1\text{H}$  NMR (400 MHz,  $\text{DMSO-}d_6$ , TMS):  $\delta$  3.3 ( $\text{DMSO-}d_6$ ),  $\delta$  2.65 (2H, dt,  $J = 15.6$ , 12.4 Hz,  $\text{CH}_2$ ), 3.28 (2H, s,  $\text{CH}_2$ ), 5.60 (1H, d,  $J = 3.7$  Hz, CH), 6.44 (1H, d,  $J = 4.3$  Hz, NH), 6.58 (1H, s, Ph), 6.61 (1H, s, NH), 6.90 (2H, s, Ph), 7.09 (2H, d,  $J = 7.5$  Hz, Ph), 7.35 (2H, d,  $J = 7.5$  Hz, Ph), 8.65 (1H, s, NH) ppm;  $^{13}\text{C}$  NMR (100 MHz,  $\text{DMSO-}d_6$ ,

TMS):  $\delta$  30.1, 38.4, 57.0, 102.1, 119.6, 119.9, 120.0, 121.0, 125.4, 130.0, 131.2, 131.7, 139.6, 144.5, 148.4, 168.1 ppm; MS calcd for  $\text{C}_{18}\text{H}_{15}\text{BrClN}_3\text{O}$  403.01, found 403.80 ( $M + 1$ ); Anal. calcd (%) for  $\text{C}_{18}\text{H}_{15}\text{BrClN}_3\text{O}$ : C 53.42, H 3.74, N 10.38; found: C 53.45, H 3.72, N 10.42.

**8-bromo-11-phenyl-2,3,4,5,10,11-hexahydro-1H-benzo[b]pyrido[4,3-e][1,4]diazepine-1-one (4daa)**

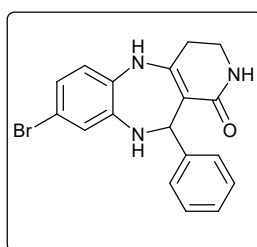

Yellow-green solid; 93%; m.p.: 250-252°C; IR (KBr): 3609, 3308, 3076, 1657, 1539, 1254  $\text{cm}^{-1}$ ;  $^1\text{H}$  NMR (400 MHz,  $\text{DMSO-}d_6$ , TMS):  $\delta$  3.3 ( $\text{DMSO-}d_6$ ),  $\delta$  2.63 (2H, dd,  $J = 12.4$ , 6.5 Hz,  $\text{CH}_2$ ), 3.26 (2H, d,  $J = 6.2$  Hz,  $\text{CH}_2$ ), 5.63 (1H, d,  $J = 5.7$  Hz, CH), 6.37 (1H, d,  $J = 5.9$  Hz, NH), 6.68 (2H, d,  $J = 6.8$  Hz, Ph), 6.77 (1H, d,  $J = 9.1$  Hz, Ph), 6.83 (1H, s, Ph), 7.04 (1H, t,  $J = 6.8$  Hz, NH), 7.17-7.12 (4H, m, Ph), 8.49 (1H, s, NH)

ppm;  $^{13}\text{C}$  NMR (100 MHz,  $\text{DMSO-}d_6$ , TMS):  $\delta$  30.1, 38.5, 57.5, 102.8, 113.1, 121.2, 122.4, 122.8, 126.5, 127.8, 128.4, 132.1, 140.2, 145.0, 148.0, 168.0 ppm; MS calcd for  $\text{C}_{18}\text{H}_{16}\text{BrN}_3\text{O}$  369.05, found 370.1 ( $M + 1$ ); Anal. calcd (%) for  $\text{C}_{18}\text{H}_{16}\text{BrN}_3\text{O}$ : C 58.39, H 4.36, N 11.35; found: C 58.43, H 4.34, N 11.38.

**8-bromo-11-(p-tolyl)-2,3,4,5,10,11-hexahydro-1H-benzo[b]pyrido[4,3-e][1,4]diazepine-1-one (4dab)**

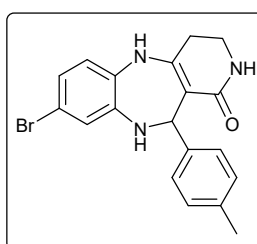

Milk white solid; 91%; m.p.: 192-194°C; IR (KBr): 3618, 3308, 3076, 1651, 1548, 1253  $\text{cm}^{-1}$ ;  $^1\text{H}$  NMR (400 MHz,  $\text{DMSO-}d_6$ , TMS):  $\delta$  3.3 ( $\text{DMSO-}d_6$ ),  $\delta$  2.16 (3H, s,  $\text{CH}_3$ ), 2.65-2.58 (2H, m,  $\text{CH}_2$ ), 3.25 (2H, d,  $J = 6.2$  Hz,  $\text{CH}_2$ ), 5.59 (1H, d,  $J = 5.6$  Hz, CH), 6.34 (1H, d,  $J = 5.9$  Hz, NH), 6.70-6.66 (2H, m, NH, Ph), 6.76 (1H, d,  $J = 8.2$  Hz, Ph), 6.83 (1H, s, Ph), 6.95 (2H, d,  $J = 7.9$  Hz, Ph), 7.01 (2H, d,  $J = 8.0$  Hz, Ph), 8.47 (1H, s, NH)

ppm;  $^{13}\text{C}$  NMR (100 MHz,  $\text{DMSO-}d_6$ , TMS):  $\delta$  21.0, 30.1, 38.5, 57.2, 103.0, 113.1, 121.1, 122.4, 122.7, 127.7, 129.0, 132.0, 135.3, 140.3, 142.0, 147.9, 168.1 ppm; MS calcd for  $\text{C}_{19}\text{H}_{18}\text{BrN}_3\text{O}$  383.06, found 383.90 ( $M + 1$ ); Anal. calcd (%) for  $\text{C}_{19}\text{H}_{18}\text{BrN}_3\text{O}$ : C 59.39, H 4.72, N 10.94; found: C 59.42, H 4.70, N 10.96.



**8-bromo-11-(4-chlorophenyl)-2,3,4,5,10,11-hexahydro-1H-benzo[b]pyrido[4,3-e][1,4]diazepine-1-one (4dac)**

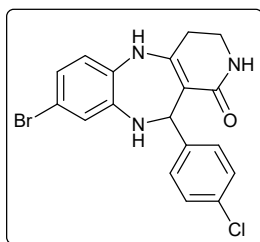

Powder white solid; 92%; m.p.: 185-187°C; IR (KBr): 3607, 3323, 3086, 1677, 1553, 1259  $\text{cm}^{-1}$ ;  $^1\text{H}$  NMR (400 MHz,  $\text{DMSO-}d_6$ , TMS):  $\delta$  3.3 ( $\text{DMSO-}d_6$ ),  $\delta$  2.70-2.58 (2H, m,  $\text{CH}_2$ ), 3.27 (2H, s,  $\text{CH}_2$ ), 5.61 (1H, d,  $J = 5.3$  Hz, CH), 6.42 (1H, d,  $J = 5.6$  Hz, NH), 6.71 (2H, d,  $J = 8.1$  Hz, NH, Ph), 6.81 (1H, d,  $J = 8.2$  Hz, Ph), 6.88 (1H, s, Ph), 7.14 (2H, d,  $J = 8.2$  Hz, Ph), 7.22 (2H, d,  $J = 8.2$  Hz, Ph), 8.60 (1H, s, NH) ppm;  $^{13}\text{C}$

NMR (100 MHz,  $\text{DMSO-}d_6$ , TMS):  $\delta$  30.1, 38.4, 57.0, 102.3, 113.3, 121.3, 122.7, 122.8, 128.3, 129.6, 131.1, 132.1, 139.9, 144.1, 148.3, 168.0 ppm; MS calcd for  $\text{C}_{18}\text{H}_{15}\text{BrClN}_3\text{O}$  403.01, found 403.80 ( $M + 1$ ); Anal. calcd (%) for  $\text{C}_{18}\text{H}_{15}\text{BrClN}_3\text{O}$ : C 53.42, H 3.74, N 10.38; found: C 53.40, H 3.72, N 10.42.

**8-bromo-11-(4-bromophenyl)-2,3,4,5,10,11-hexahydro-1H-benzo[b]pyrido[4,3-e][1,4]diazepine-1-one (4dad)**

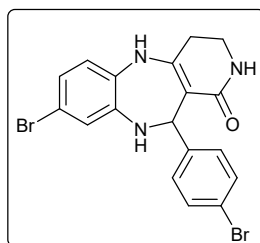

Milk white solid; 94%; m.p.: 175-176°C; IR (KBr): 3612, 3308, 3086, 1657, 1559, 1253  $\text{cm}^{-1}$ ;  $^1\text{H}$  NMR (400 MHz,  $\text{DMSO-}d_6$ , TMS):  $\delta$  3.3 ( $\text{DMSO-}d_6$ ),  $\delta$  2.68-2.58 (2H, m,  $\text{CH}_2$ ), 3.27 (2H, s,  $\text{CH}_2$ ), 5.58 (1H, d,  $J = 5.6$  Hz, CH), 6.40 (1H, d,  $J = 5.8$  Hz, NH), 6.74-6.67 (2H, m, NH, Ph), 6.79 (1H, d,  $J = 8.4$  Hz, Ph), 6.86 (1H, s, Ph), 7.07 (2H, d,  $J = 8.2$  Hz, Ph), 7.36 (2H, d,  $J = 8.2$  Hz, Ph), 8.54 (1H, s, NH) ppm;  $^{13}\text{C}$  NMR (100 MHz,

$\text{DMSO-}d_6$ , TMS):  $\delta$  30.1, 38.4, 57.0, 102.3, 113.3, 119.6, 121.3, 122.8, 130.0, 131.3, 132.0, 139.9, 144.5, 148.2, 167.9 ppm; MS calcd for  $\text{C}_{18}\text{H}_{15}\text{Br}_2\text{N}_3\text{O}$  446.96, found 447.80 ( $M + 1$ ); Anal. calcd (%) for  $\text{C}_{18}\text{H}_{15}\text{Br}_2\text{N}_3\text{O}$ : C 48.14, H 3.37, N 9.36; found: C 48.13, H 3.36, N 9.40.

**1-oxo-2,3,4,5,10,11-hexahydro-1H-benzo[b]pyrido[4,3-e][1,4]diazepine-11-carboxylic acid (4aae)**

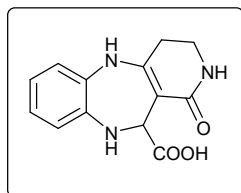

Brown-yellow solid; 87%; m.p.: 167-169°C; IR (KBr): 3455, 3323, 3096, 1722, 1658, 1553, 1233  $\text{cm}^{-1}$ ;  $^1\text{H}$  NMR (400 MHz,  $\text{DMSO-}d_6$ , TMS):  $\delta$  3.3 ( $\text{DMSO-}d_6$ ),  $\delta$  2.55 (2H, t,  $J = 4.7$  Hz,  $\text{CH}_2$ ), 3.24 (2H, s,  $\text{CH}_2$ ), 4.89 (1H, s, CH), 5.98 (1H, d,  $J = 1.1$  Hz, NH), 6.69 (1H, t,  $J = 7.3$  Hz, NH), 6.75 (1H, t,  $J = 7.3$  Hz, Ph), 6.83 (1H, d,  $J = 7.6$  Hz, Ph), 6.93 (1H, d,  $J = 7.6$  Hz, Ph), 7.33 (1H, s, Ph), 8.69 (1H, s, NH), 13.11 (1H, s, COOH) ppm;  $^{13}\text{C}$  NMR (100 MHz,  $\text{DMSO-}d_6$ , TMS):  $\delta$

30.4, 38.2, 57.5, 96.9, 120.1, 120.1, 121.5, 122.6, 131.0, 138.6, 148.8, 170.1, 173.4 ppm; MS calcd for  $\text{C}_{13}\text{H}_{13}\text{N}_3\text{O}_3$  259.10, found 260.20 ( $M + 1$ ); Anal. calcd (%) for  $\text{C}_{13}\text{H}_{13}\text{N}_3\text{O}_3$ : C 68.05, H 5.11, N 12.53; found: C 68.07, H 5.10, N 12.55.

**8-methyl-1-oxo-2,3,4,5,10,11-hexahydro-1H-benzo[b]pyrido[4,3-e][1,4]diazepine-11-carboxylic acid (4bae)**

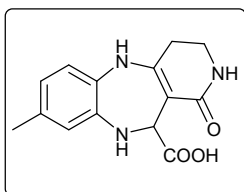

Brown-yellow solid; 89%; m.p.: 184-185°C; IR (KBr): 3446, 3347, 1736, 1638, 1568, 1238  $\text{cm}^{-1}$ ;  $^1\text{H}$  NMR (400 MHz,  $\text{DMSO-}d_6$ , TMS):  $\delta$  3.3 ( $\text{DMSO-}d_6$ ),  $\delta$  2.15 (3H, s,  $\text{CH}_3$ ), 2.75-2.54 (2H, m,  $\text{CH}_2$ ), 3.23 (2H, s,  $\text{CH}_2$ ), 4.86 (1H, d,  $J = 0.6$  Hz, CH), 5.89 (1H, d,  $J = 0.6$  Hz, NH), 6.50 (1H, d,  $J = 6.6$  Hz, Ph), 6.63 (1H, s, NH), 6.81 (1H, d,  $J = 6.2$  Hz, Ph), 7.31 (1H, s, Ph), 8.62 (1H, s, NH), 13.17 (1H, s, COOH) ppm;  $^{13}\text{C}$  NMR (100 MHz,  $\text{DMSO-}d_6$ , TMS):  $\delta$  20.7, 30.5, 38.2, 57.4, 96.2, 120.2, 120.9, 121.7, 128.5, 131.3, 138.4, 148.9, 170.2, 173.4 ppm; MS calcd for  $\text{C}_{14}\text{H}_{15}\text{N}_3\text{O}_3$  273.11, found 274.20 ( $M + 1$ ); Anal. calcd (%) for  $\text{C}_{14}\text{H}_{15}\text{N}_3\text{O}_3$ : C 68.75, H 5.48, N 12.03; found: C 68.78, H 5.50, N 12.05.

**8-chloro-1-oxo-2,3,4,5,10,11-hexahydro-1H-benzo[b]pyrido[4,3-e][1,4]diazepine-11-carboxylic acid (4cae)**

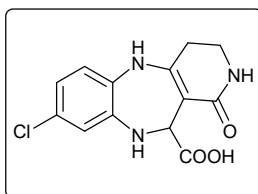

Yellow-green solid; 85%; m.p.: 204-205°C; IR (KBr): 3460, 3342, 1716, 1637, 1558, 1238  $\text{cm}^{-1}$ ;  $^1\text{H}$  NMR (400 MHz,  $\text{DMSO-}d_6$ , TMS):  $\delta$  3.3 ( $\text{DMSO-}d_6$ ),  $\delta$  2.65 (2H, dt,  $J = 22.6, 7.7$  Hz,  $\text{CH}_2$ ), 3.24 (2H, s,  $\text{CH}_2$ ), 4.92 (1H, d,  $J = 5.3$  Hz, CH), 6.26 (1H, d,  $J = 5.5$  Hz, NH), 6.72 (1H, dd,  $J = 8.5, 1.9$  Hz, NH), 6.88 (1H, d,  $J = 1.9$  Hz, Ph), 6.92 (1H, d,  $J = 8.5$  Hz, Ph), 7.38 (1H, s, Ph), 8.76 (1H, s, NH), 13.15 (1H, s, COOH) ppm;  $^{13}\text{C}$  NMR (100 MHz,  $\text{DMSO-}d_6$ , TMS):  $\delta$  30.3, 38.2, 57.2, 97.3, 119.6, 120.3, 121.4, 125.9, 130.0, 140.1, 148.5, 169.8, 173.1 ppm; MS calcd for  $\text{C}_{13}\text{H}_{12}\text{ClN}_3\text{O}_3$  293.06, found 294.10 ( $M + 1$ ); Anal. calcd (%) for  $\text{C}_{13}\text{H}_{12}\text{ClN}_3\text{O}_3$ : C 61.71, H 4.36, N 11.36; found: C 61.73, H 4.35, N 11.34.

**8-bromo-1-oxo-2,3,4,5,10,11-hexahydro-1H-benzo[b]pyrido[4,3-e][1,4]diazepine-11-carboxylic acid (4dae)**

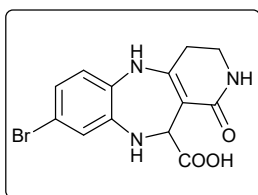

Creamy yellow solid; 85%; m.p.: 227-228°C; IR (KBr): 3455, 3337, 1711, 1638, 1564, 1249  $\text{cm}^{-1}$ ;  $^1\text{H}$  NMR (400 MHz,  $\text{DMSO-}d_6$ , TMS):  $\delta$  3.3 ( $\text{DMSO-}d_6$ ),  $\delta$  2.71-2.53 (2H, m,  $\text{CH}_2$ ), 3.24 (2H, s,  $\text{CH}_2$ ), 4.95 (1H, d,  $J = 1.6$  Hz, CH), 6.28 (1H, d,  $J = 0.5$  Hz, NH), 6.95-6.82 (2H, m, NH, Ph), 7.06-6.99 (1H, m, Ph), 7.38 (1H, s, Ph), 8.84 (1H, s, NH), 13.14 (1H, s, COOH) ppm;  $^{13}\text{C}$  NMR (100 MHz,  $\text{DMSO-}d_6$ , TMS):  $\delta$  30.3, 38.2, 57.3, 97.5, 113.8, 121.8, 122.4, 123.1, 130.5, 140.4, 148.5, 169.8, 173.2 ppm; MS calcd for  $\text{C}_{13}\text{H}_{12}\text{BrN}_3\text{O}_3$  337.01, found 338.10 ( $M + 1$ ); Anal. calcd (%) for  $\text{C}_{13}\text{H}_{12}\text{BrN}_3\text{O}_3$ : C 55.09, H 3.89, N 10.14; found: C 55.11, H 3.90, N 10.12.

<sup>1</sup>H NMR and <sup>13</sup>C NMR spectra of the synthesized compound **4aaa-4dae**

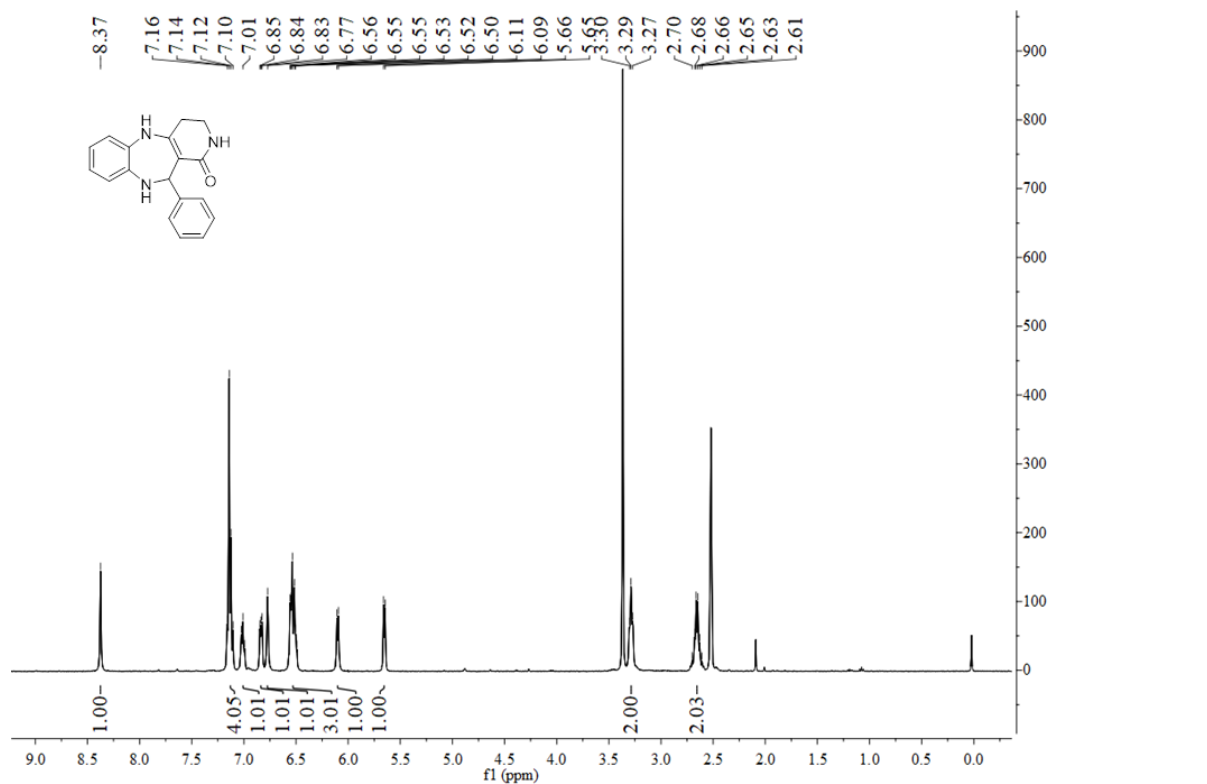

<sup>1</sup>H NMR spectra of compound **4aaa**

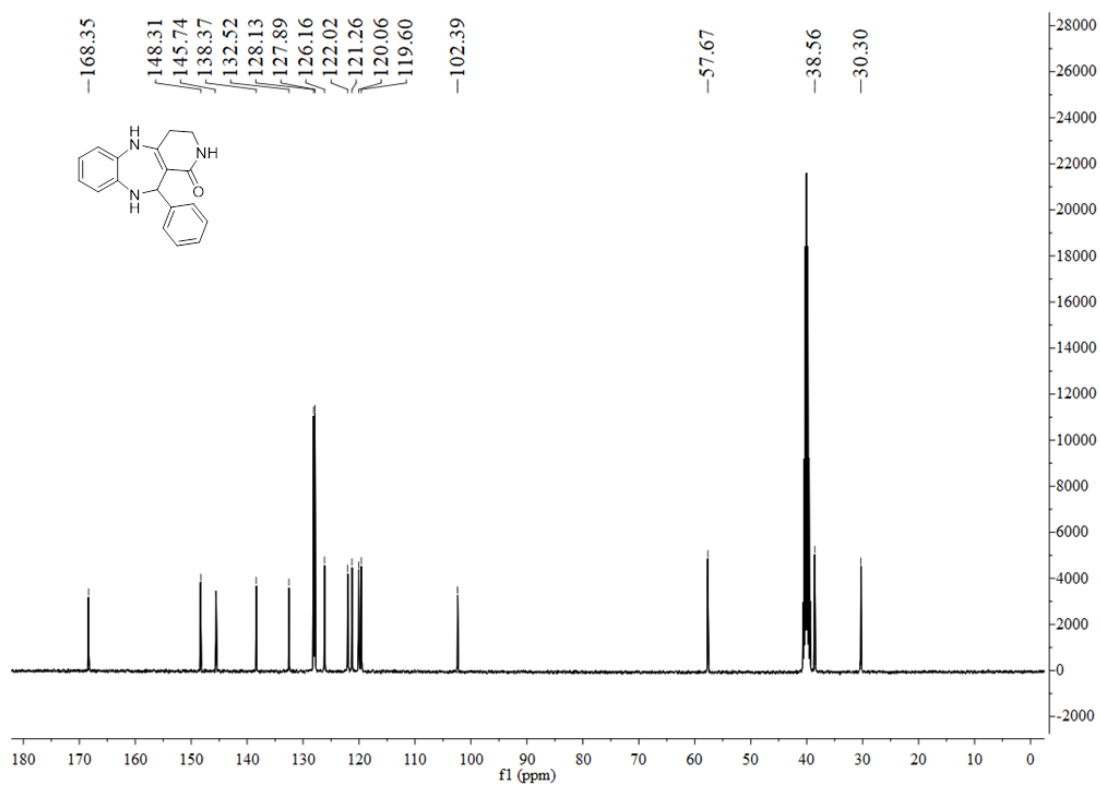

<sup>13</sup>C NMR spectra of compound **4aaa**

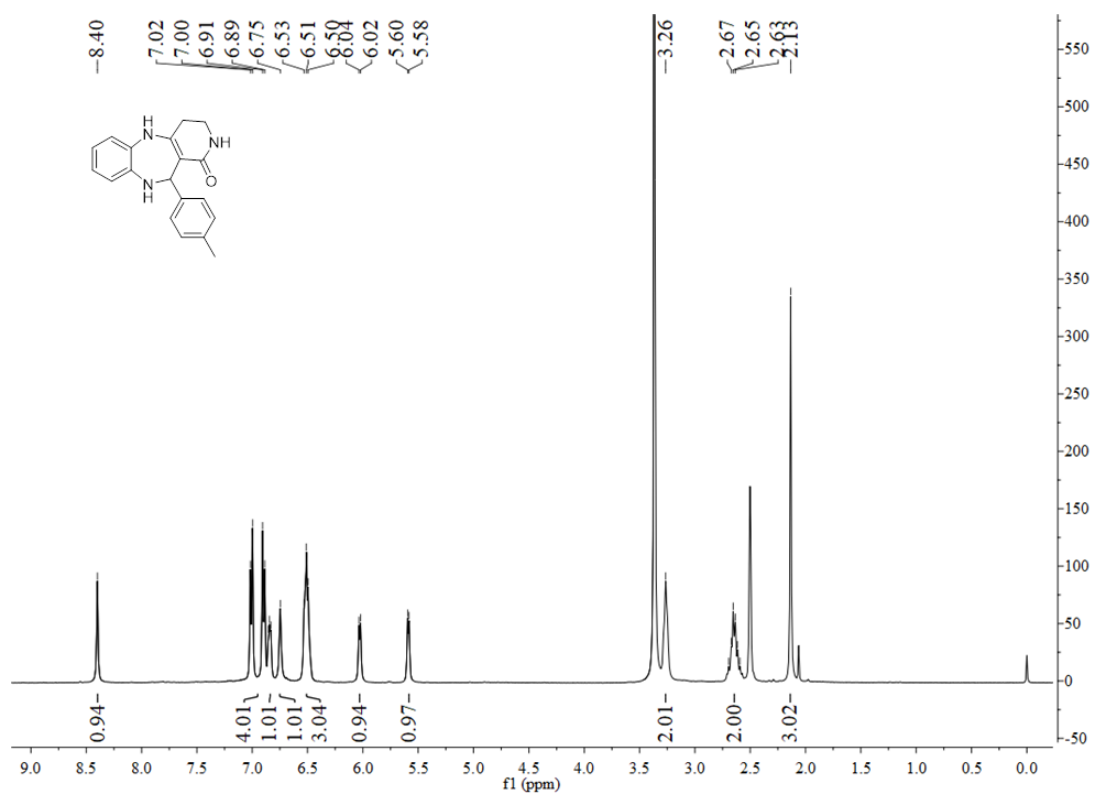

<sup>1</sup>H NMR spectra of compound 4aab

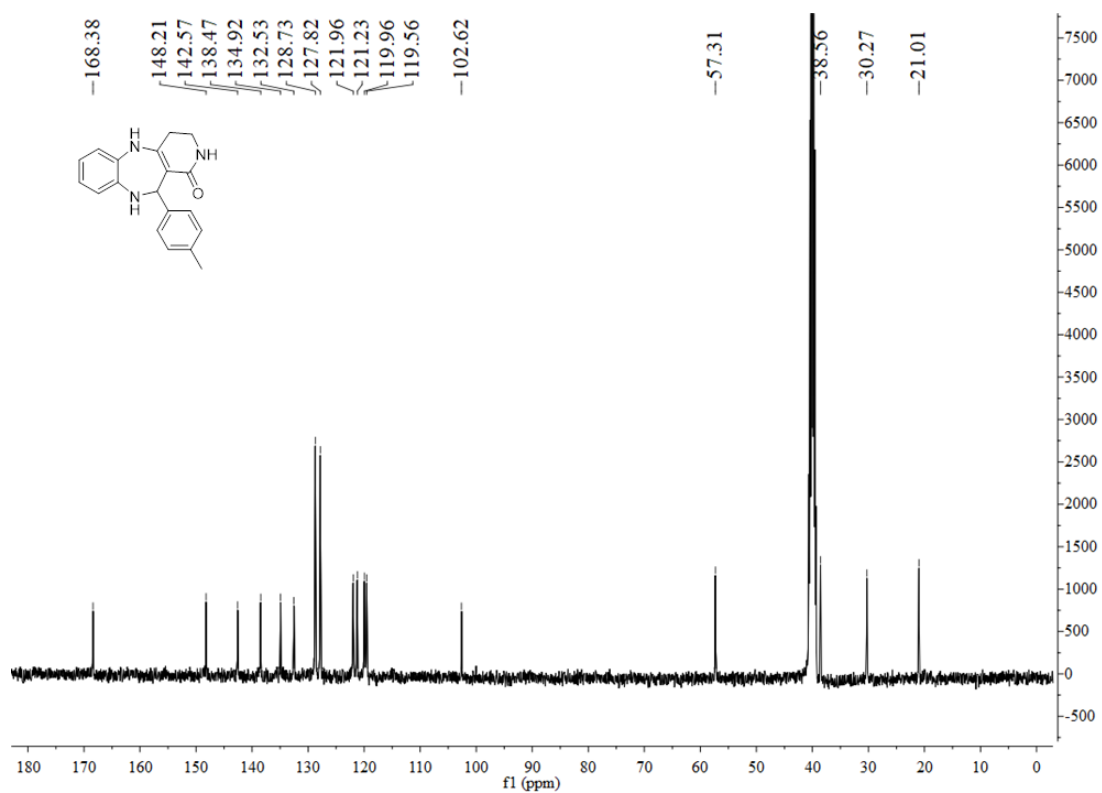

<sup>13</sup>C NMR spectra of compound 4aab

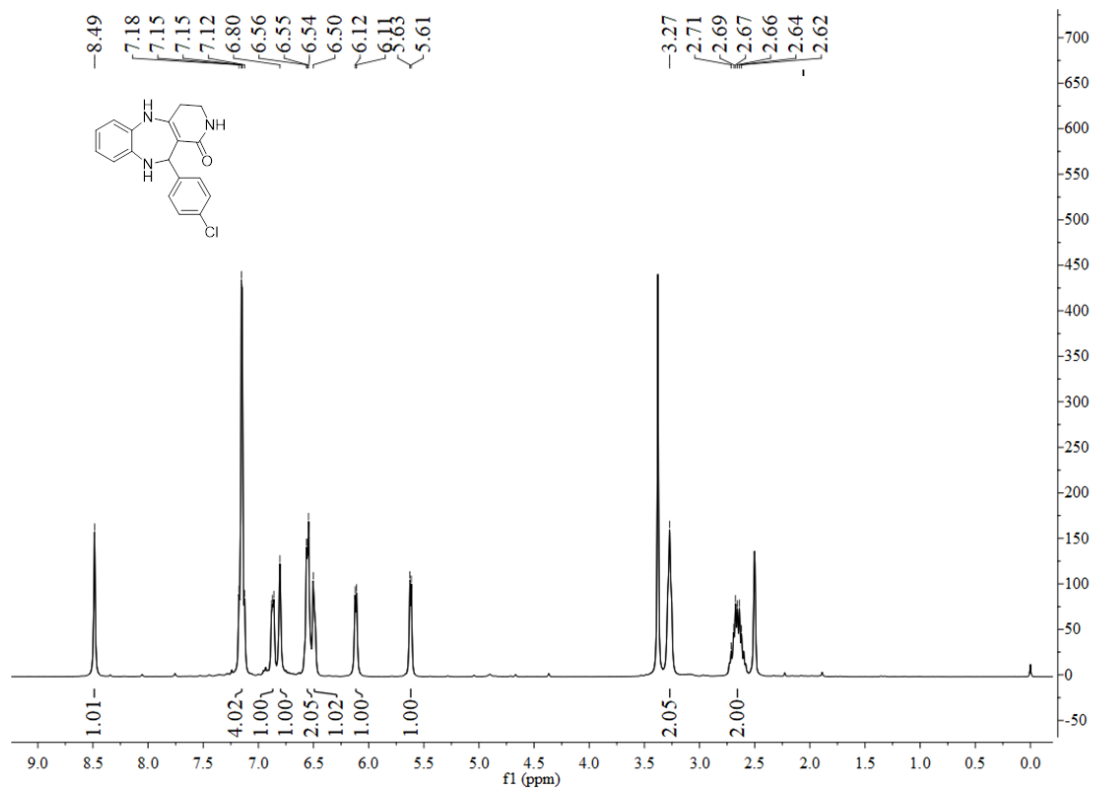

<sup>1</sup>H NMR spectra of compound 4aac

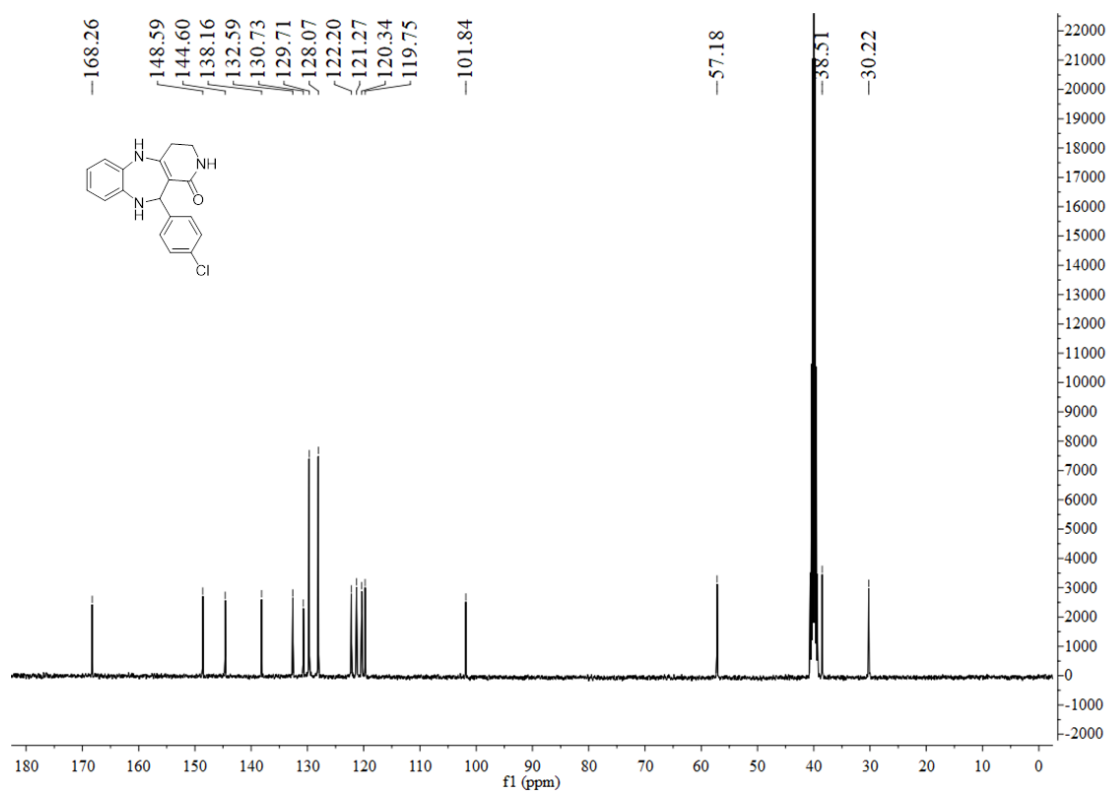

<sup>13</sup>C NMR spectra of compound 4aac

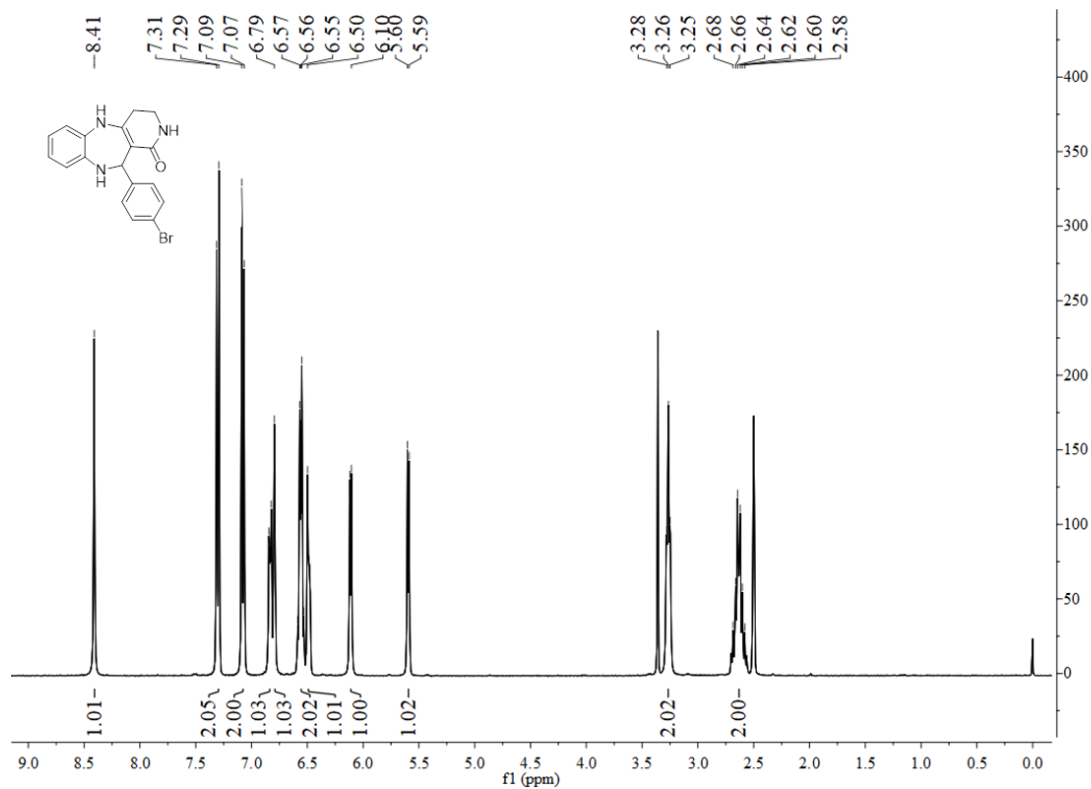

<sup>1</sup>H NMR spectra of compound 4aad

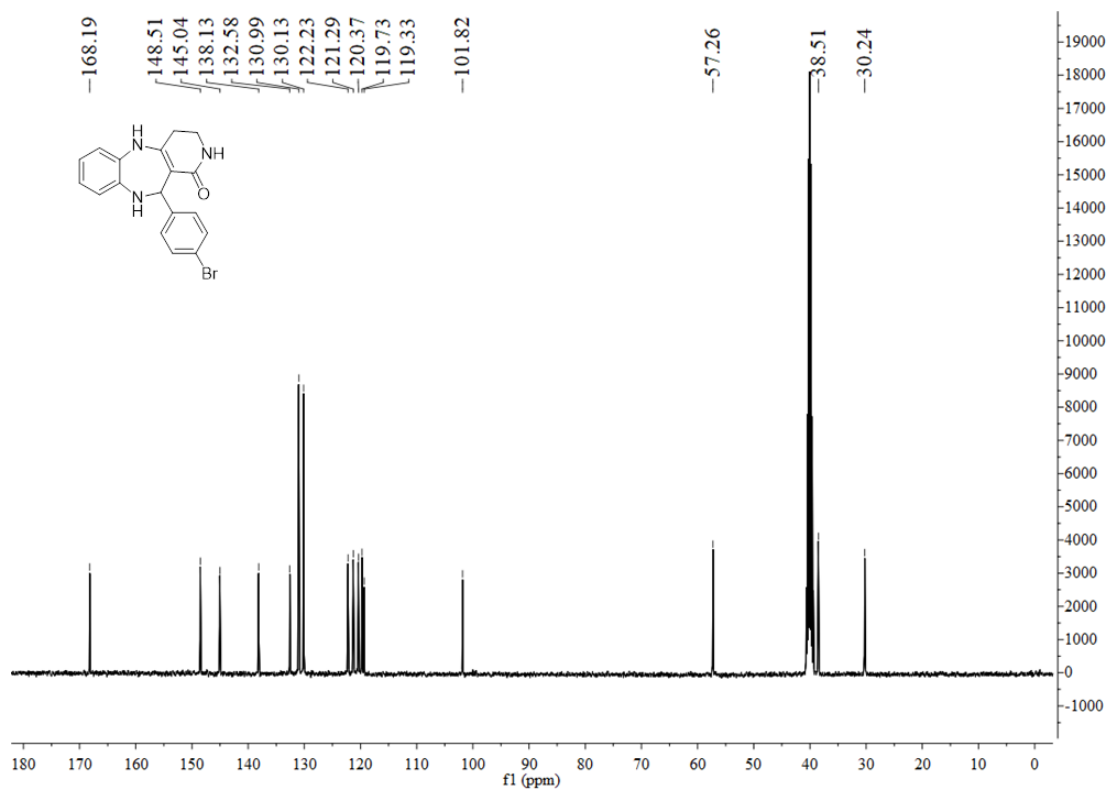

<sup>13</sup>C NMR spectra of compound 4aad

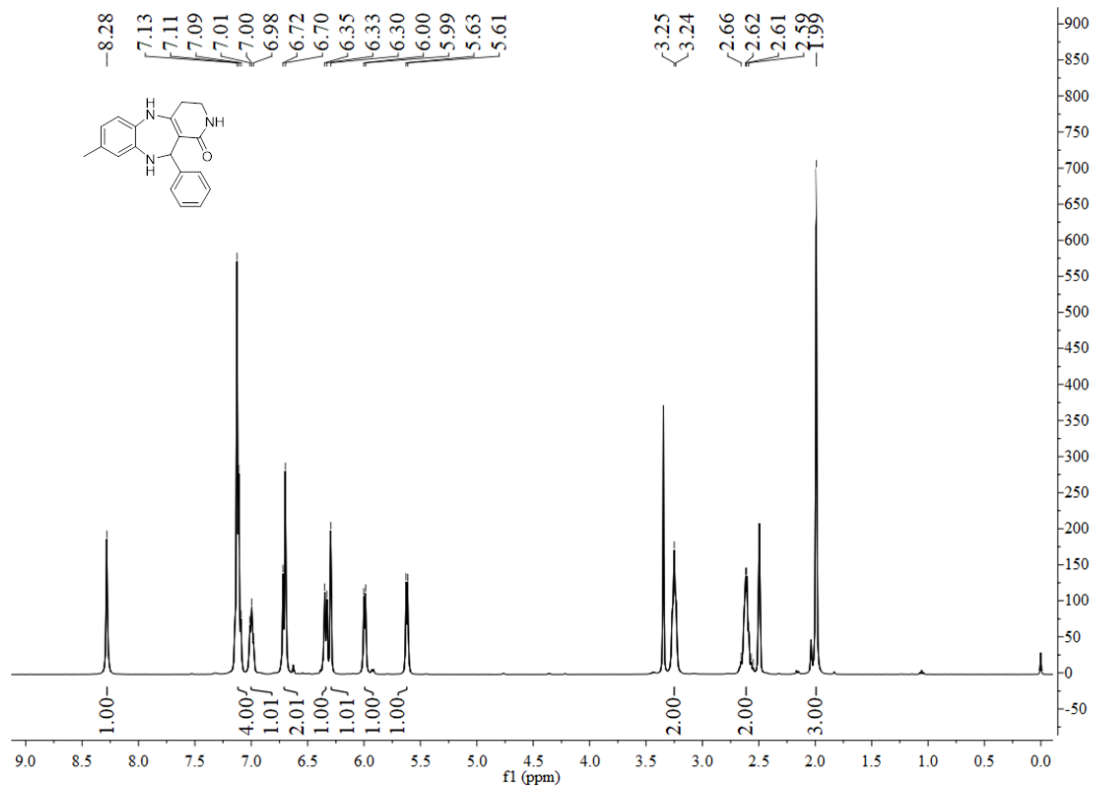

<sup>1</sup>H NMR spectra of compound 4baa

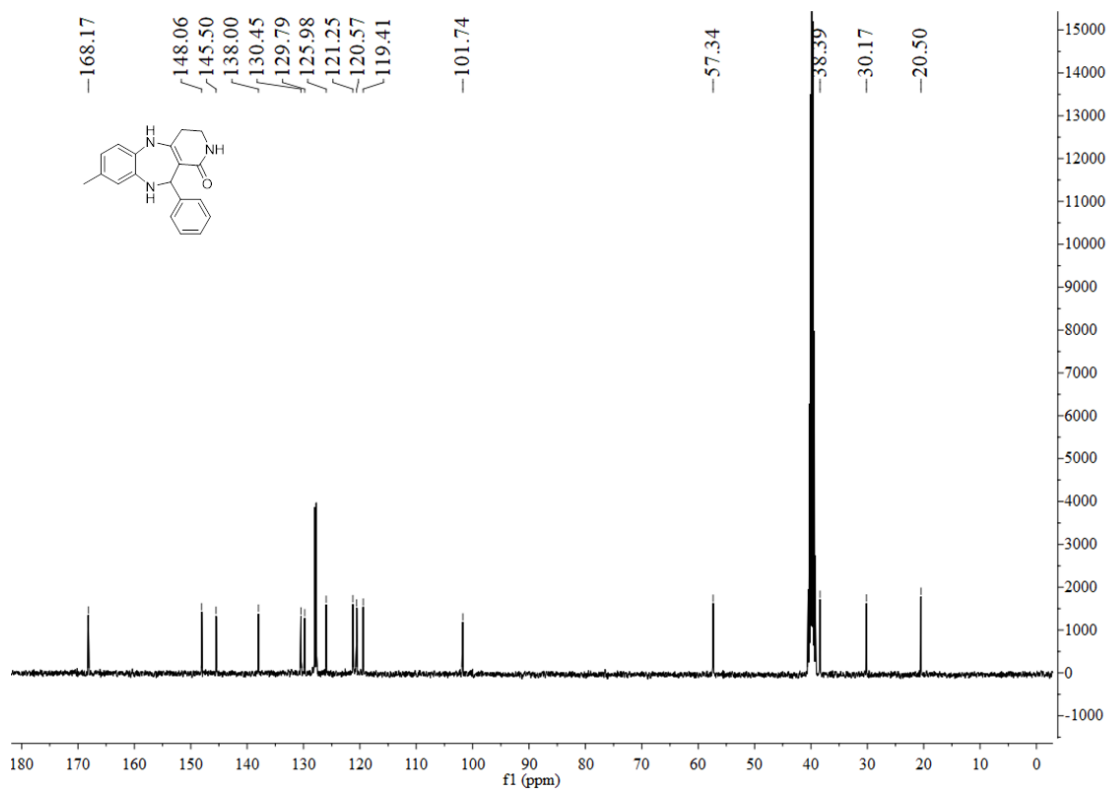

<sup>13</sup>C NMR spectra of compound 4baa

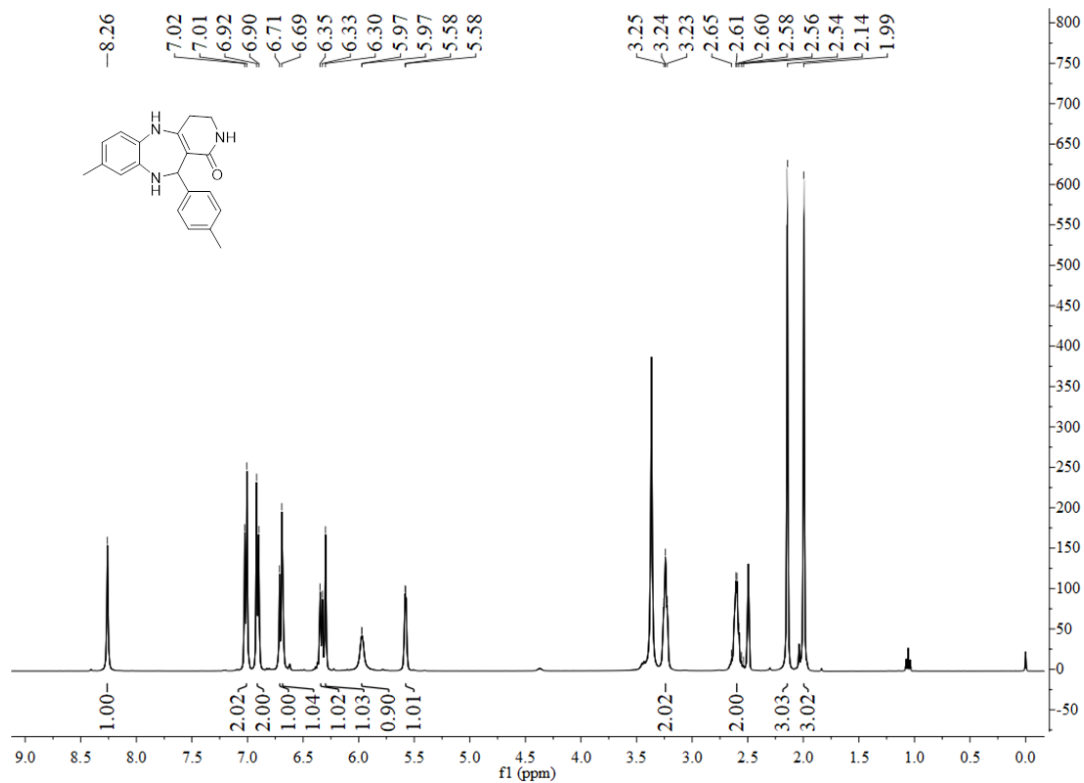

<sup>1</sup>H NMR spectra of compound 4bab

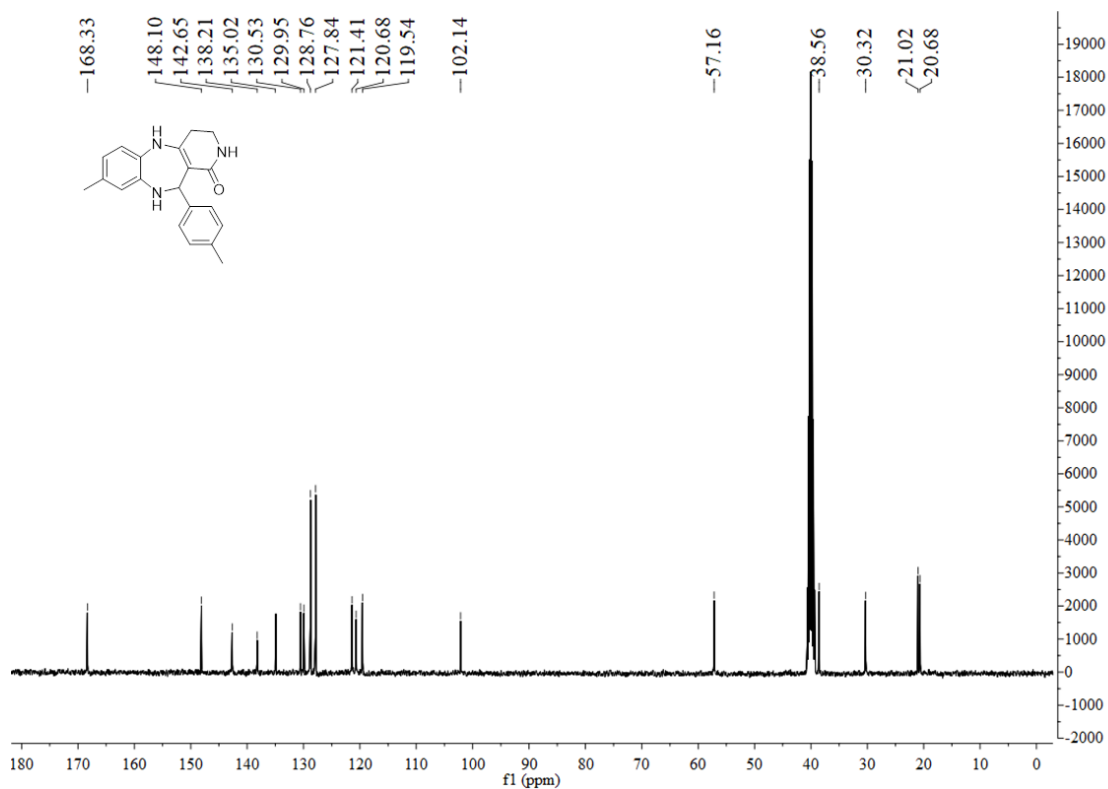

<sup>13</sup>C NMR spectra of compound 4bab



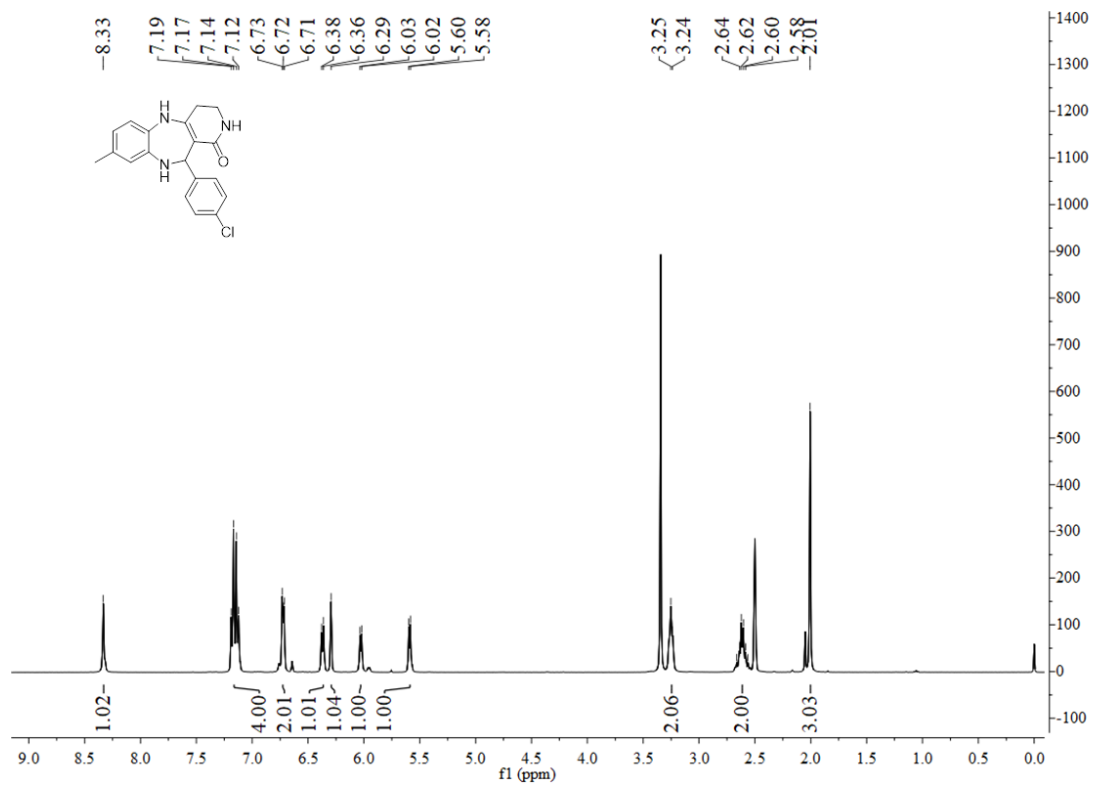

<sup>1</sup>H NMR spectra of compound **4bac**

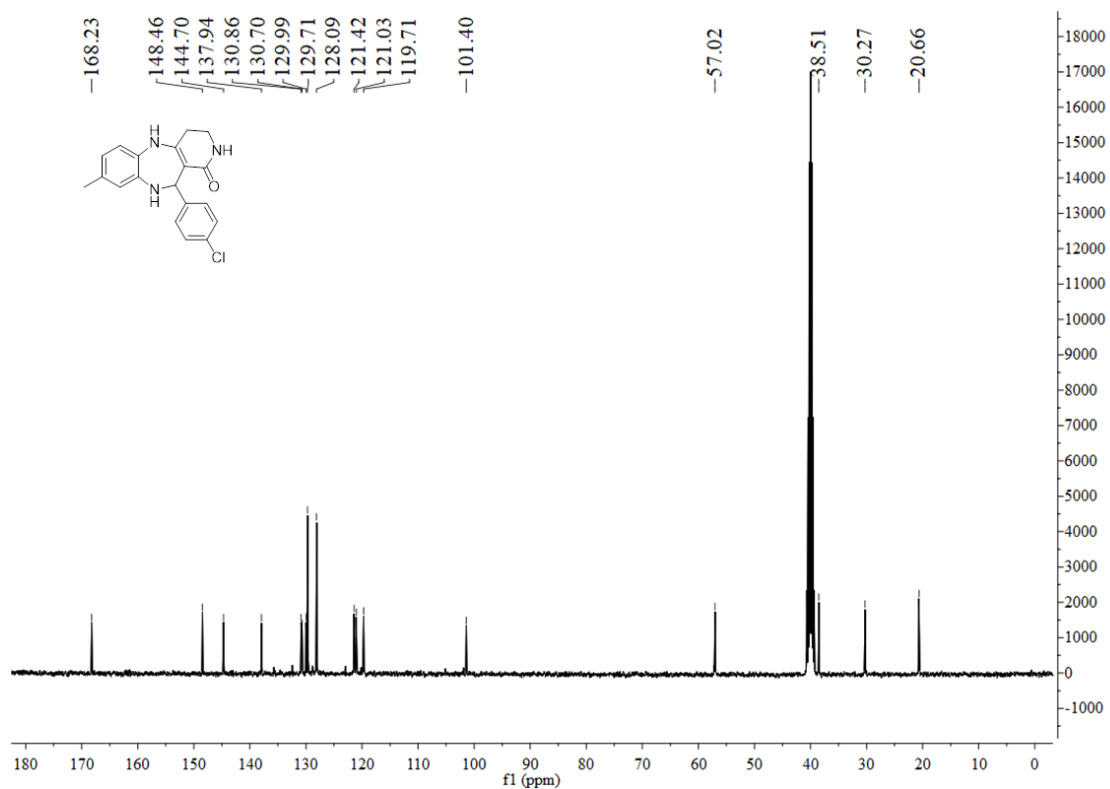

<sup>13</sup>C NMR spectra of compound **4bac**

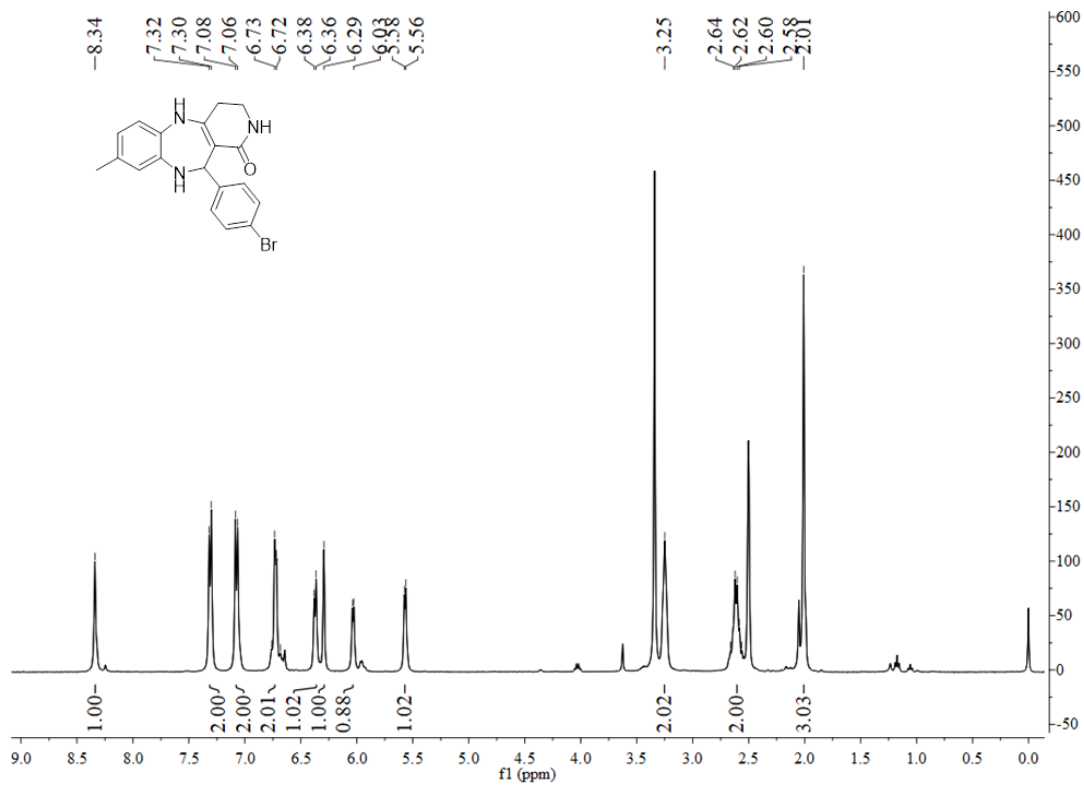

<sup>1</sup>H NMR spectra of compound 4bad

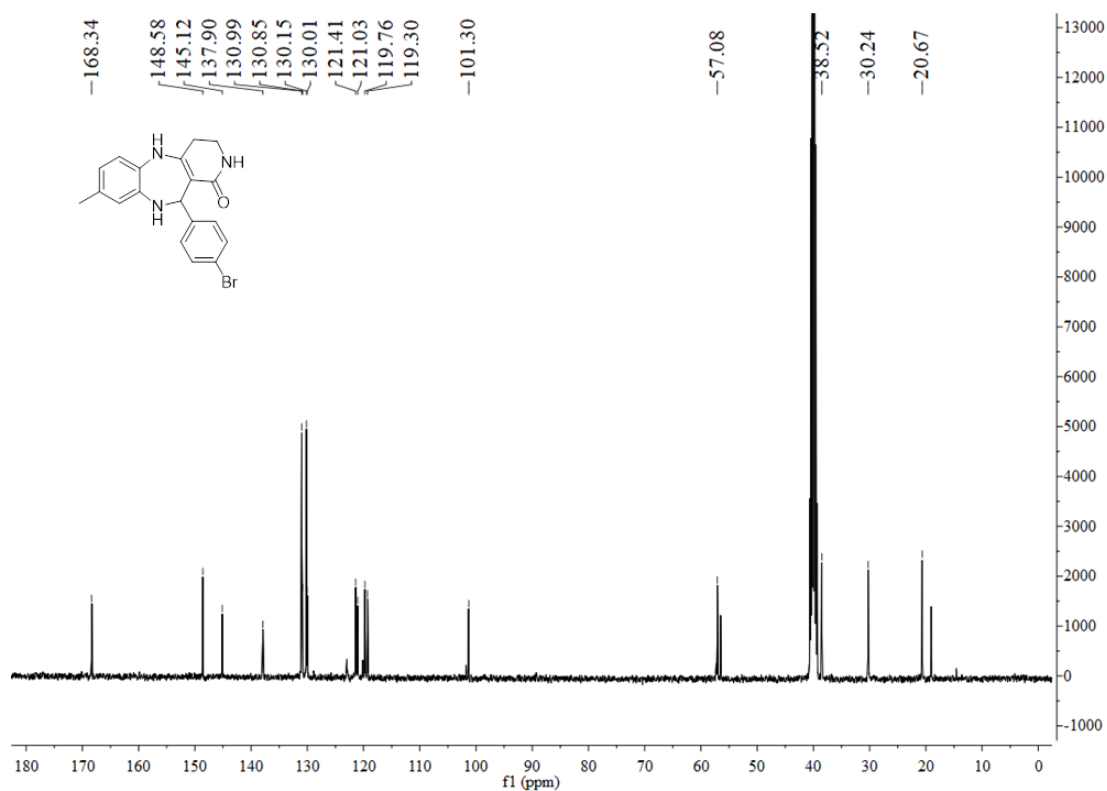

<sup>13</sup>C NMR spectra of compound 4bad

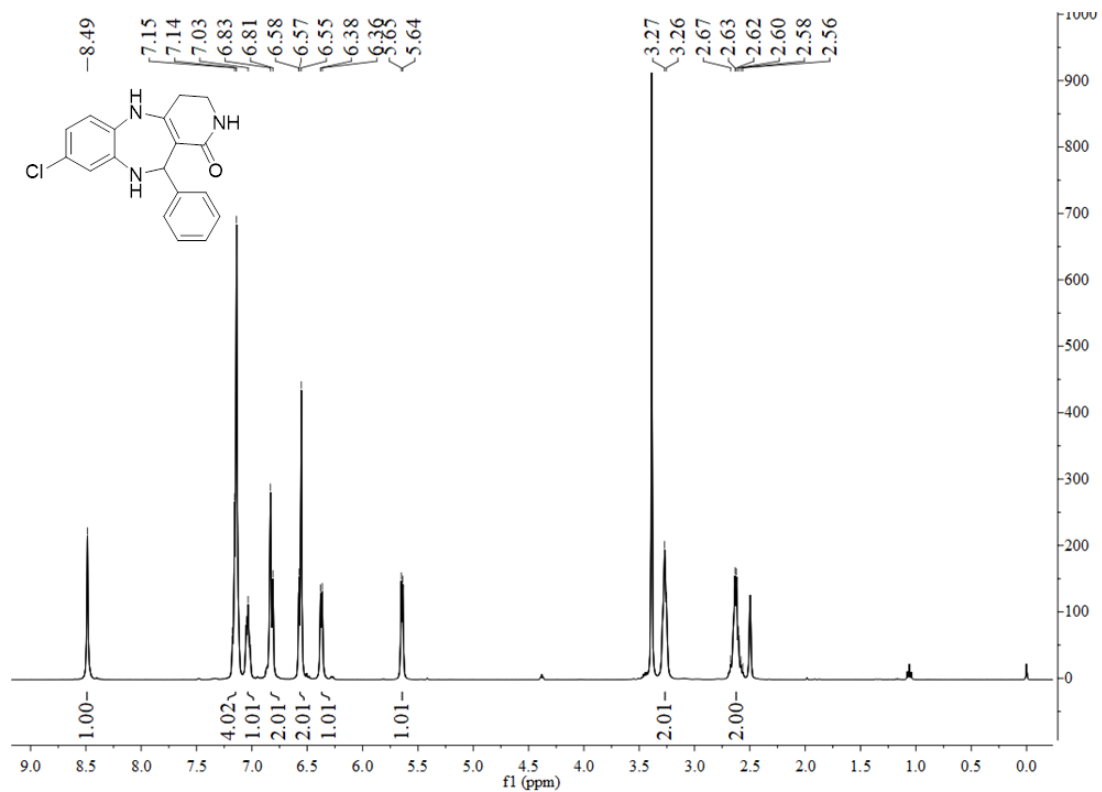

<sup>1</sup>H NMR spectra of compound 4caa

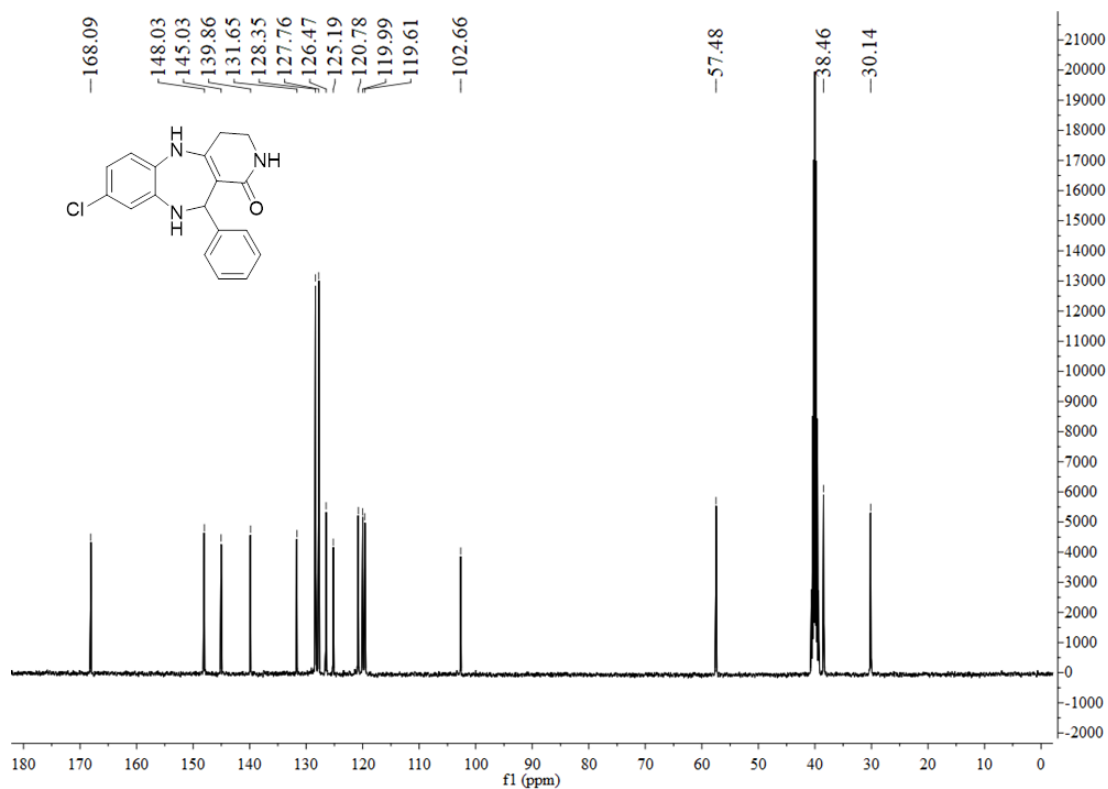

<sup>13</sup>C NMR spectra of compound 4caa

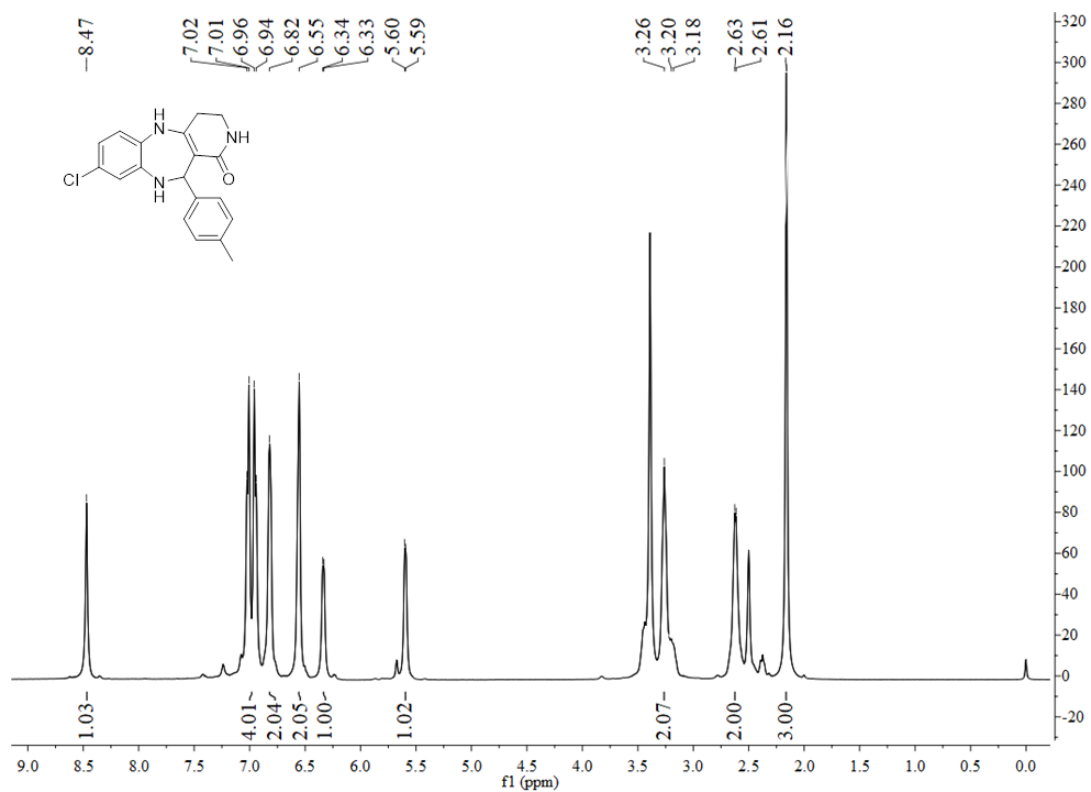

<sup>1</sup>H NMR spectra of compound 4cab

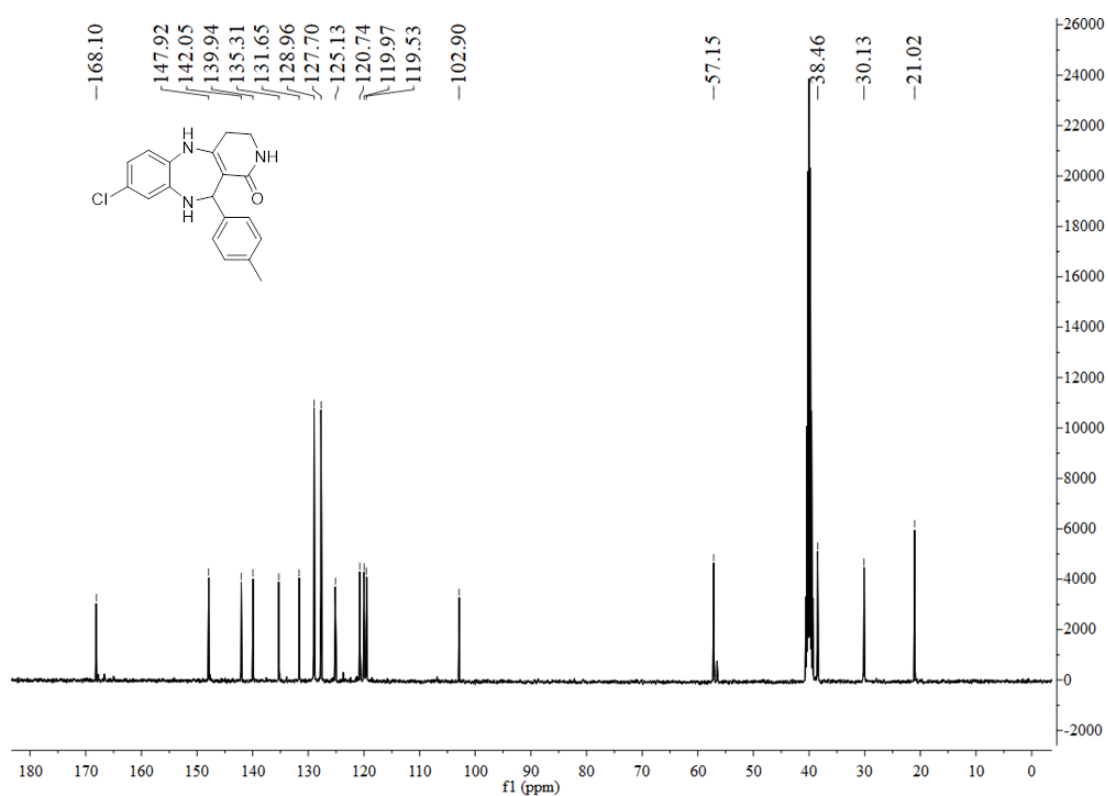

<sup>13</sup>C NMR spectra of compound 4cab

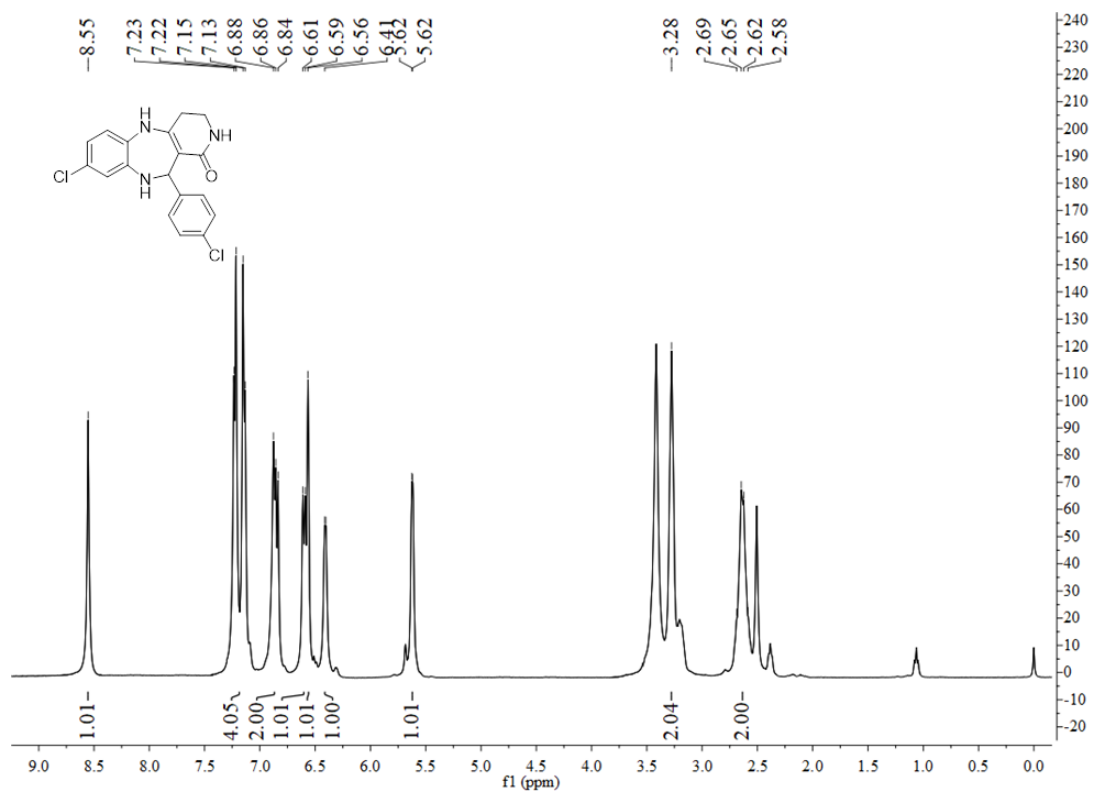

<sup>1</sup>H NMR spectra of compound 4cac

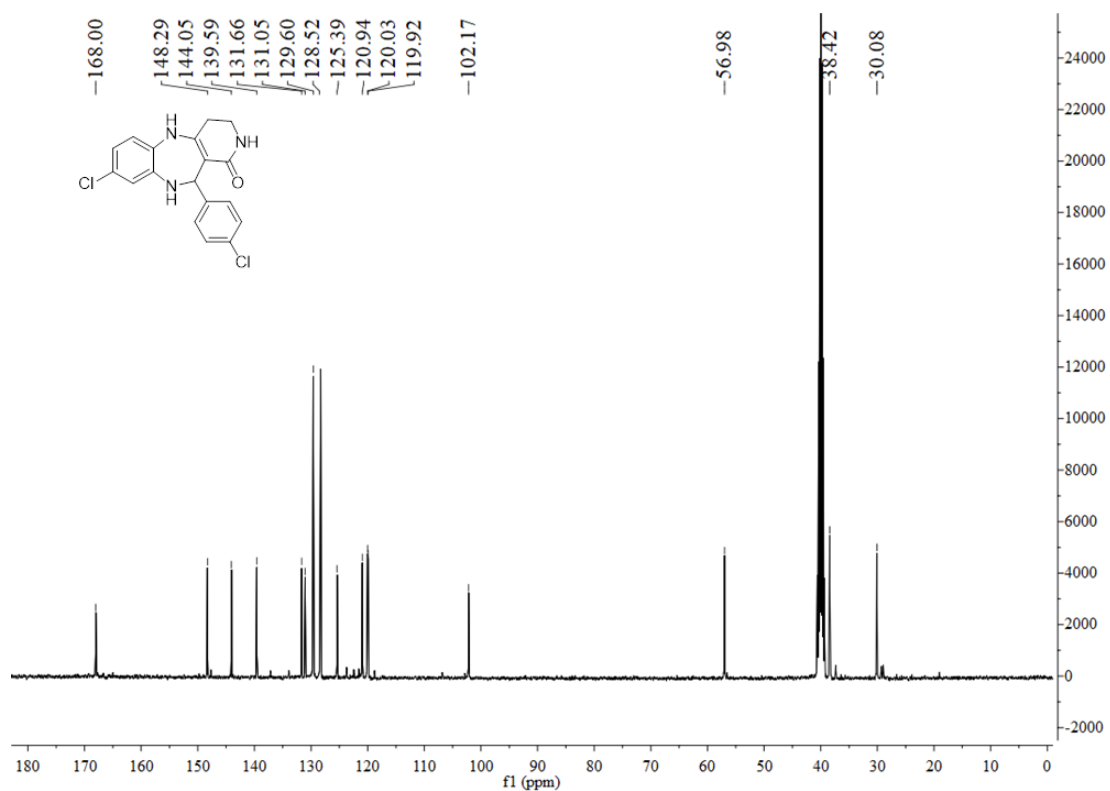

<sup>13</sup>C NMR spectra of compound 4cac

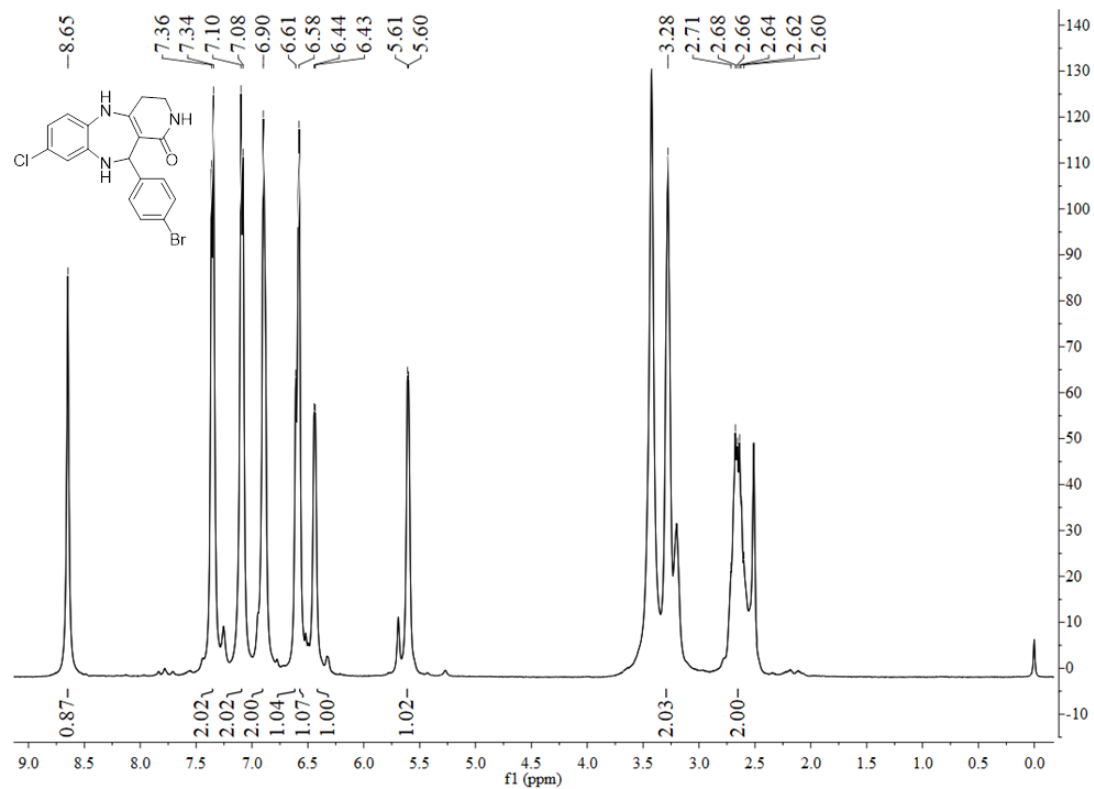

<sup>1</sup>H NMR spectra of compound 4cad

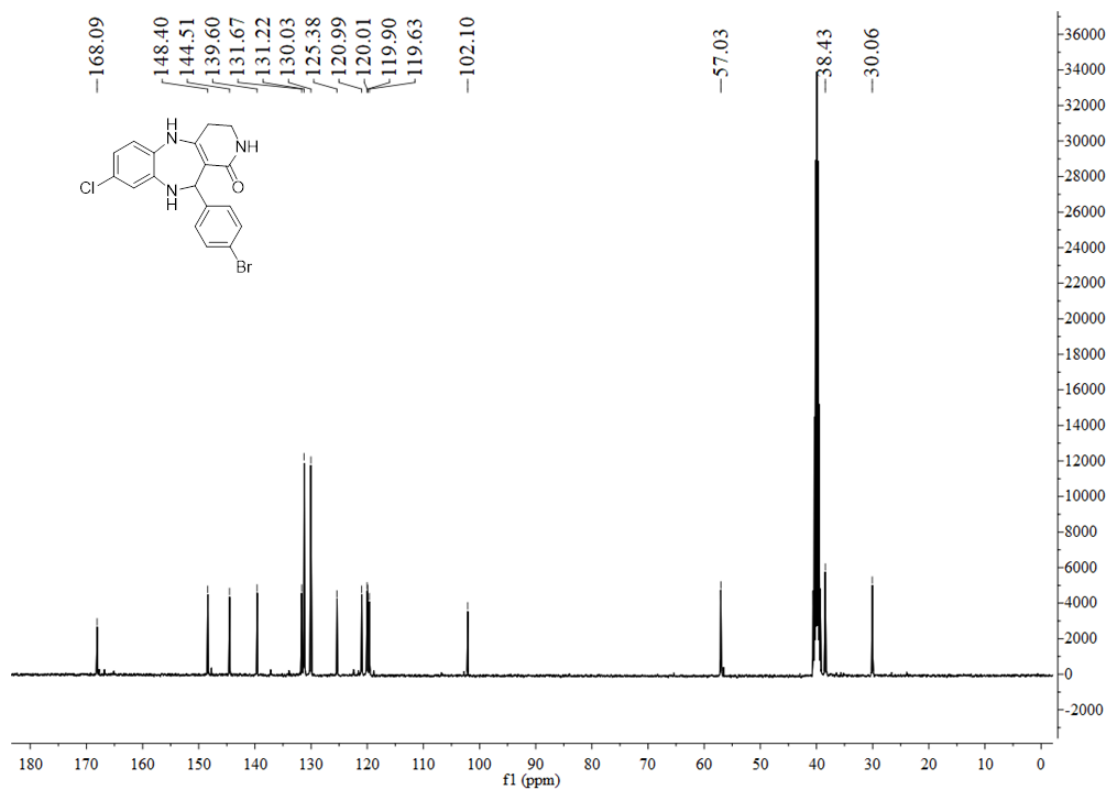

<sup>13</sup>C NMR spectra of compound 4cad

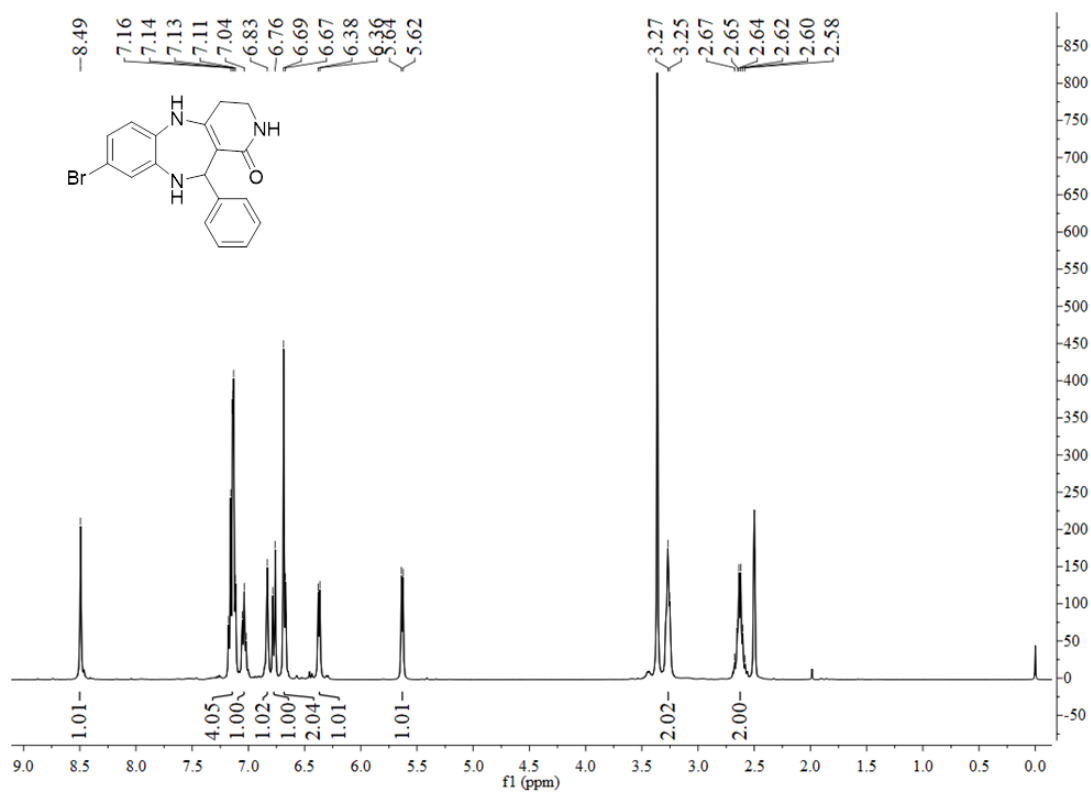

<sup>1</sup>H NMR spectra of compound 4daa

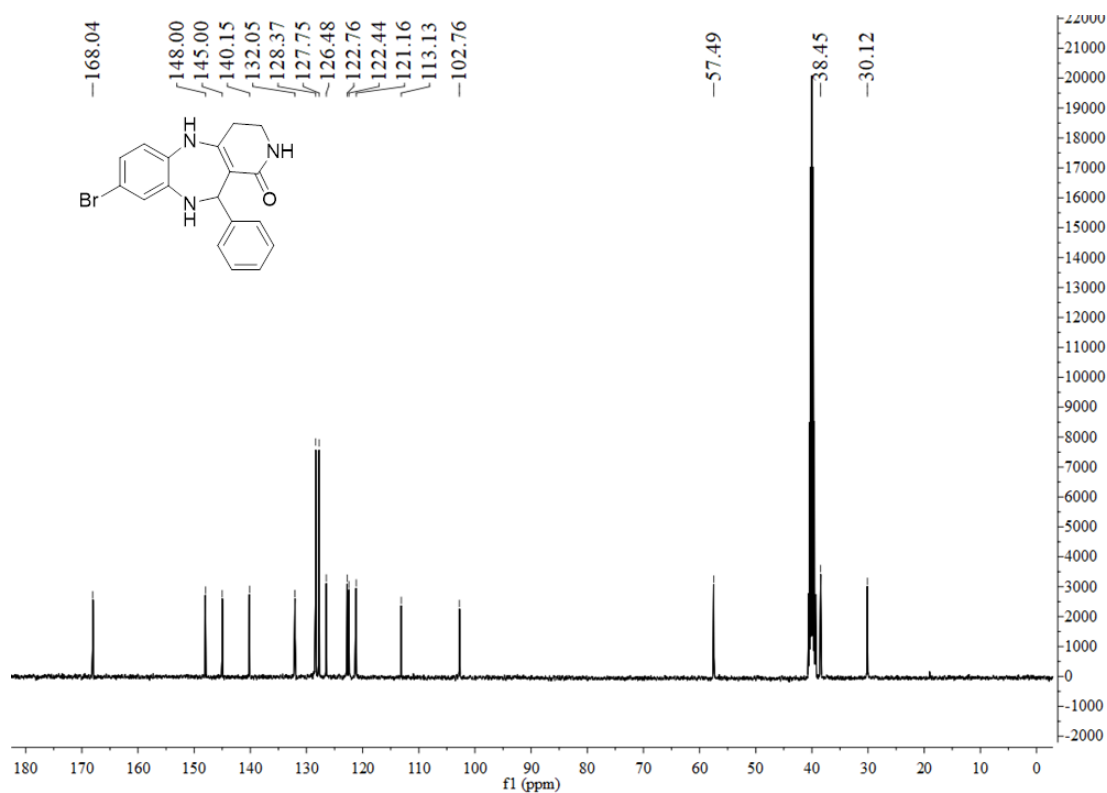

<sup>13</sup>C NMR spectra of compound 4daa

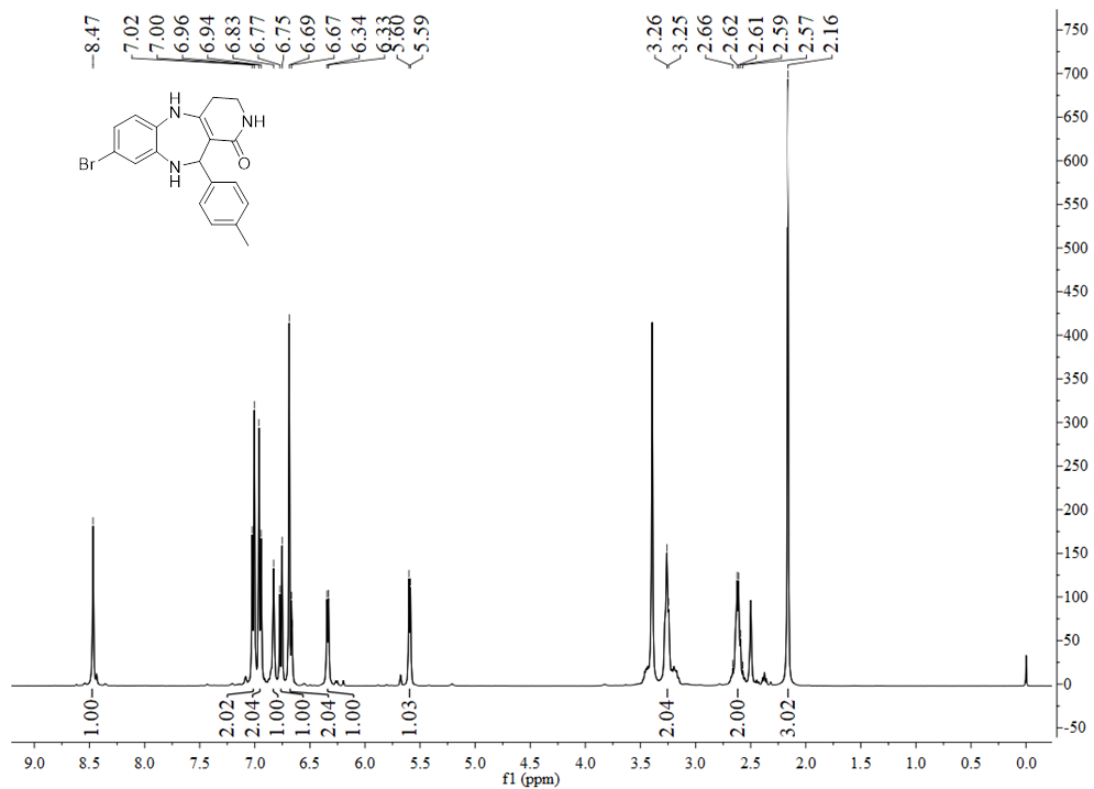

<sup>1</sup>H NMR spectra of compound 4dab

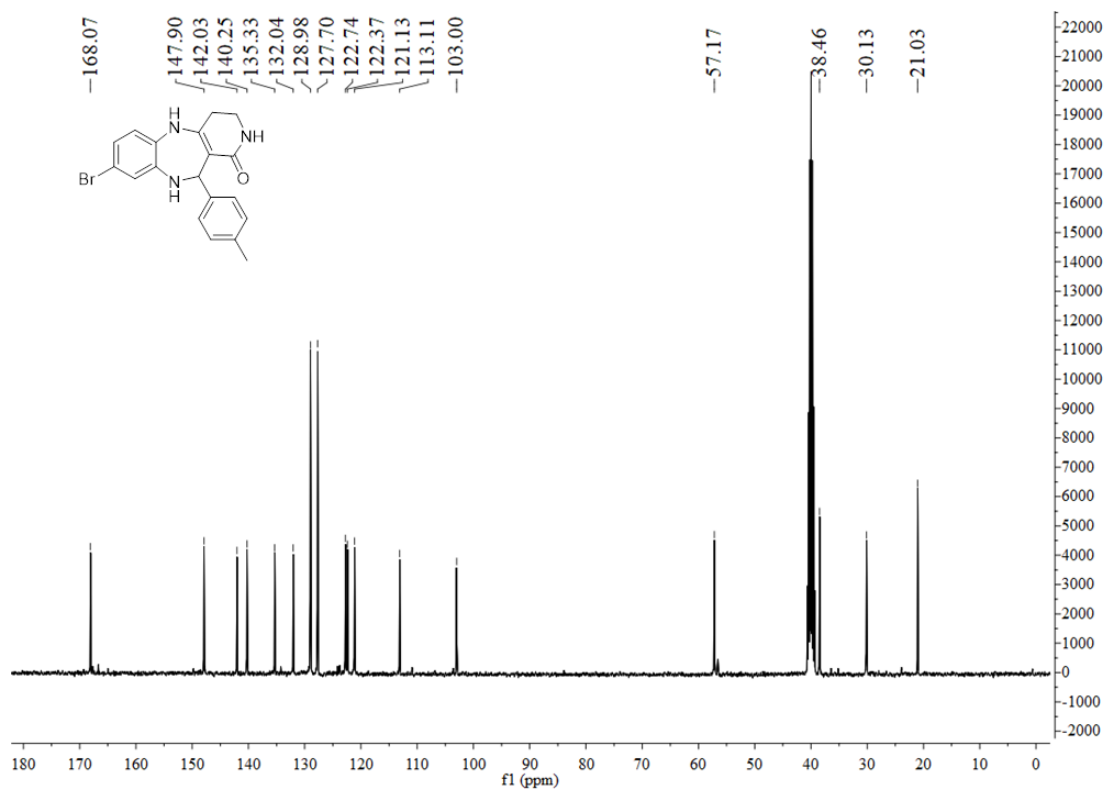

<sup>13</sup>C NMR spectra of compound 4dab



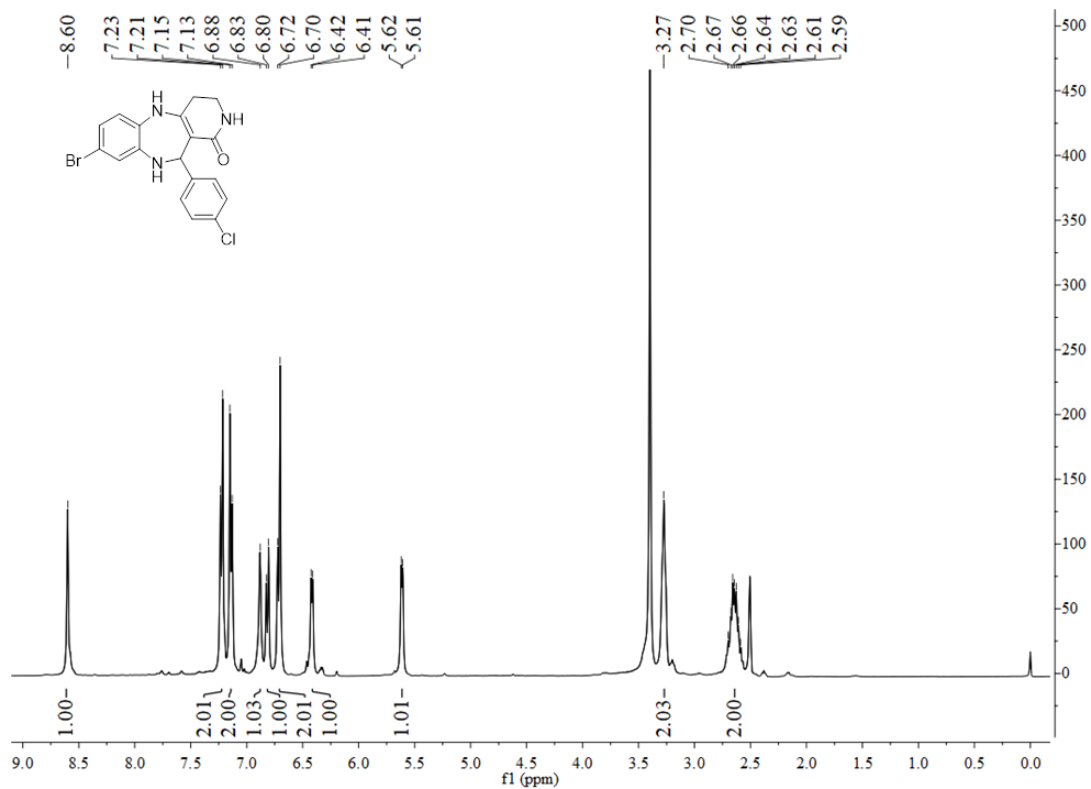

<sup>1</sup>H NMR spectra of compound 4dac

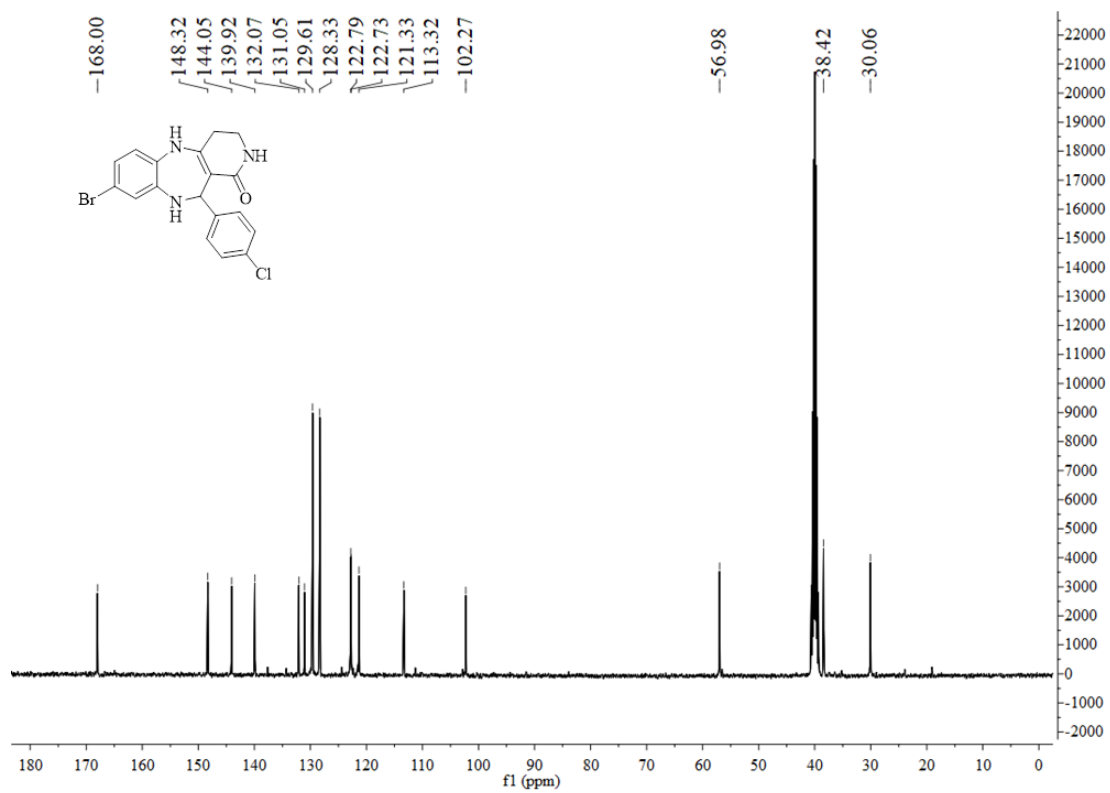

<sup>13</sup>C NMR spectra of compound 4dac

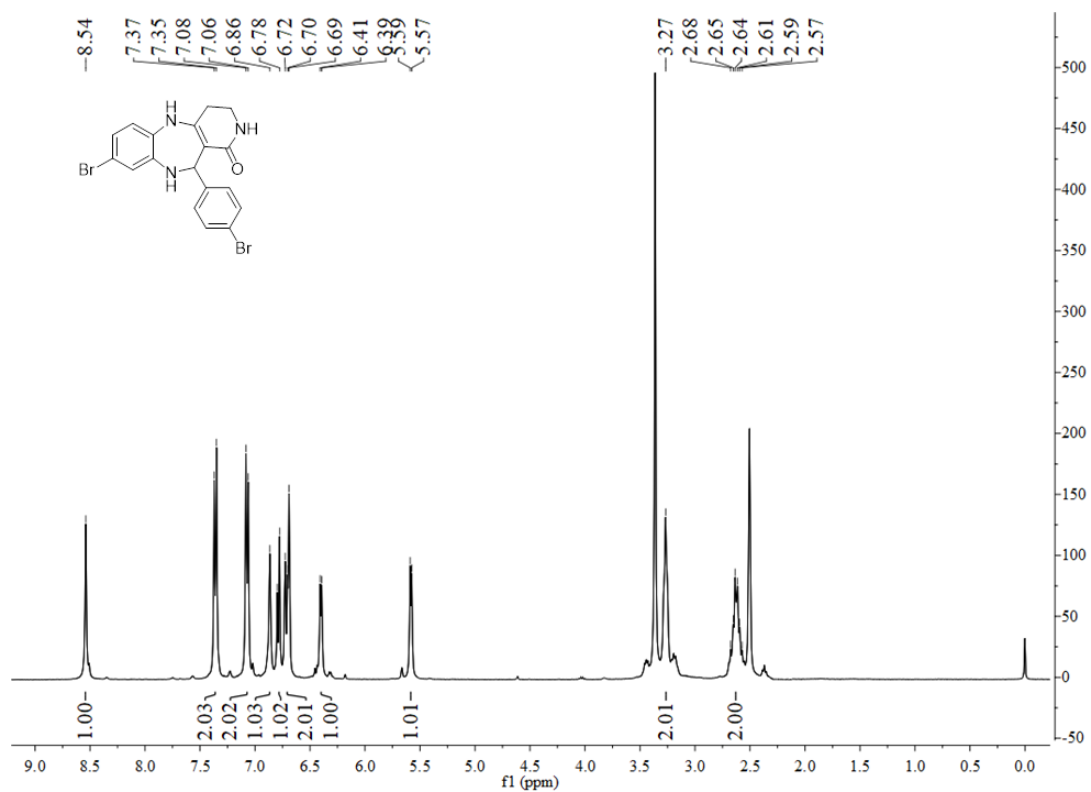

<sup>1</sup>H NMR spectra of compound 4dad

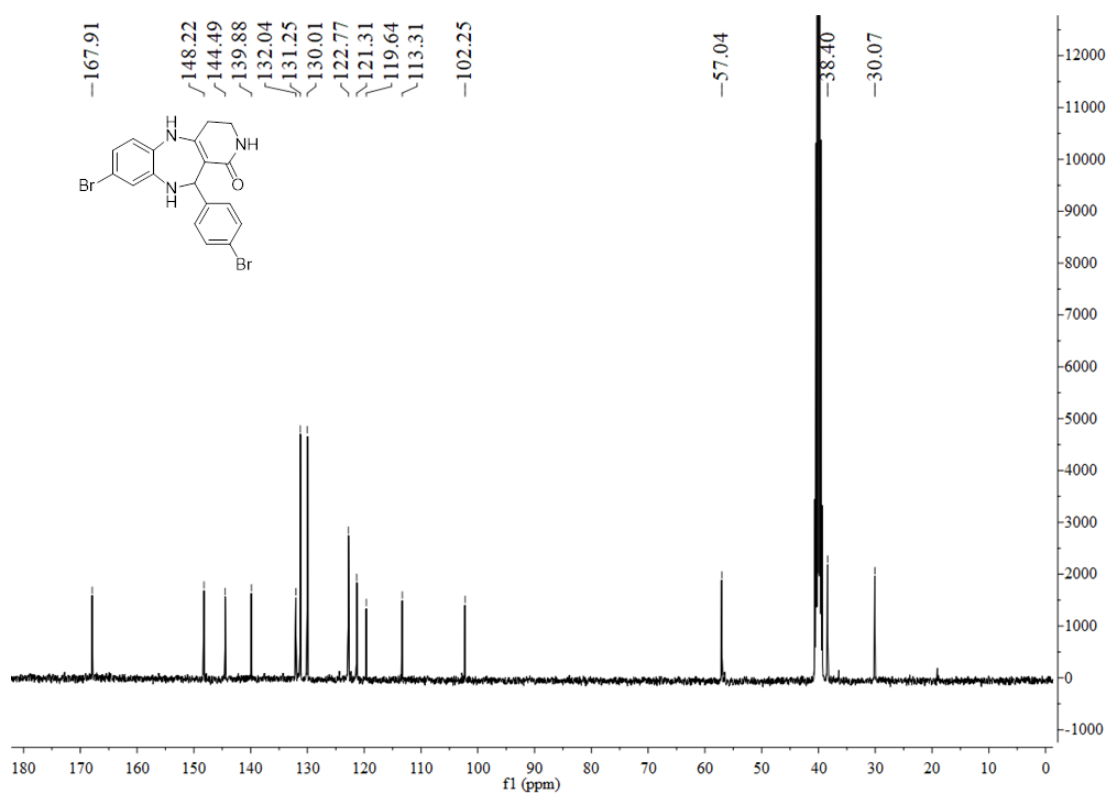

<sup>13</sup>C NMR spectra of compound 4dad

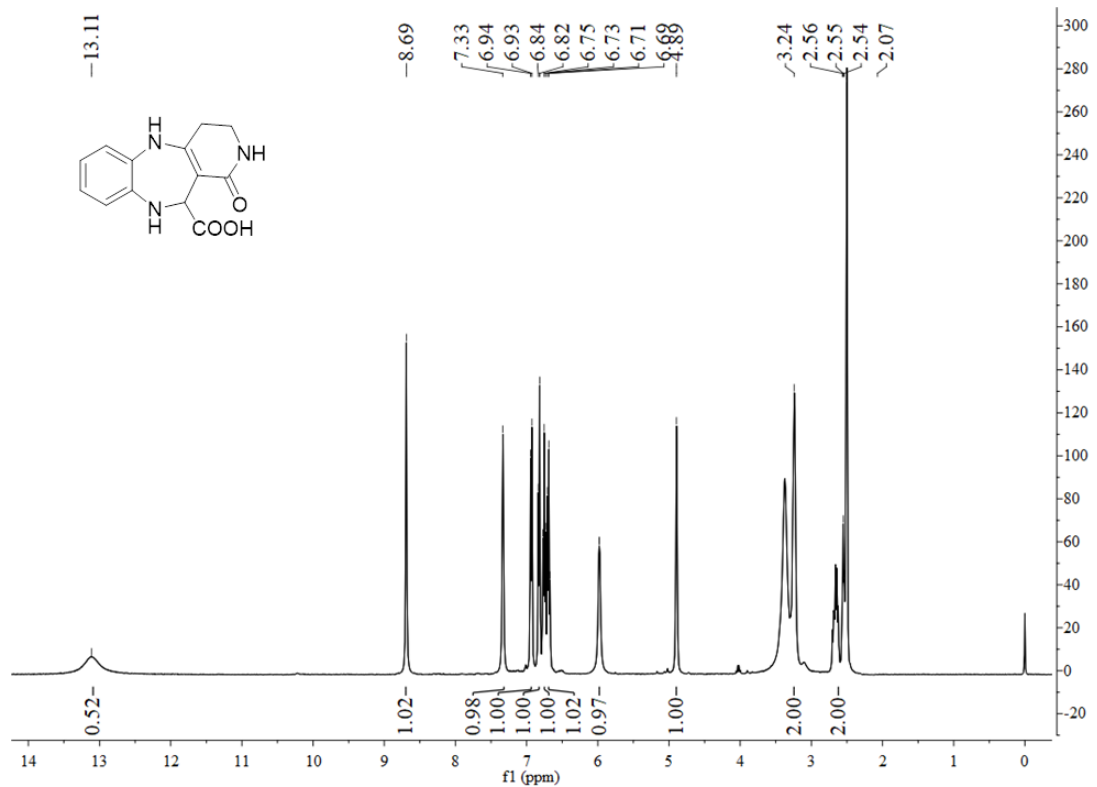

<sup>1</sup>H NMR spectra of compound 4aae

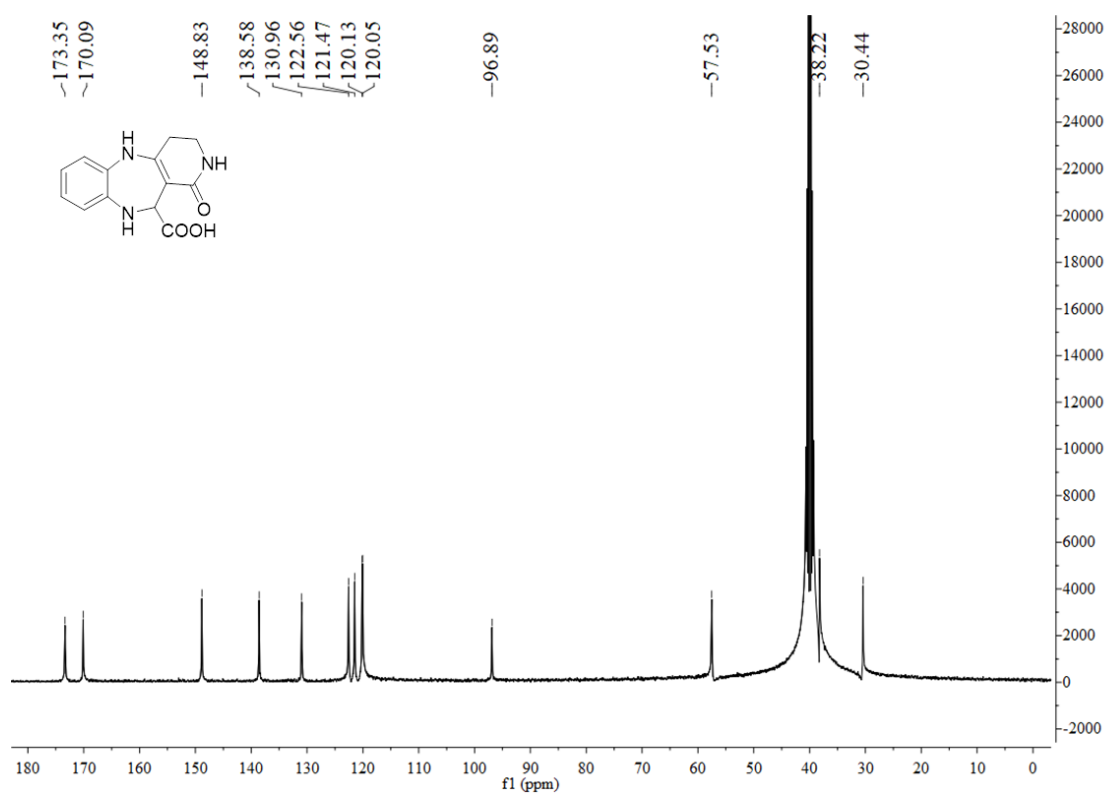

<sup>13</sup>C NMR spectra of compound 4aae

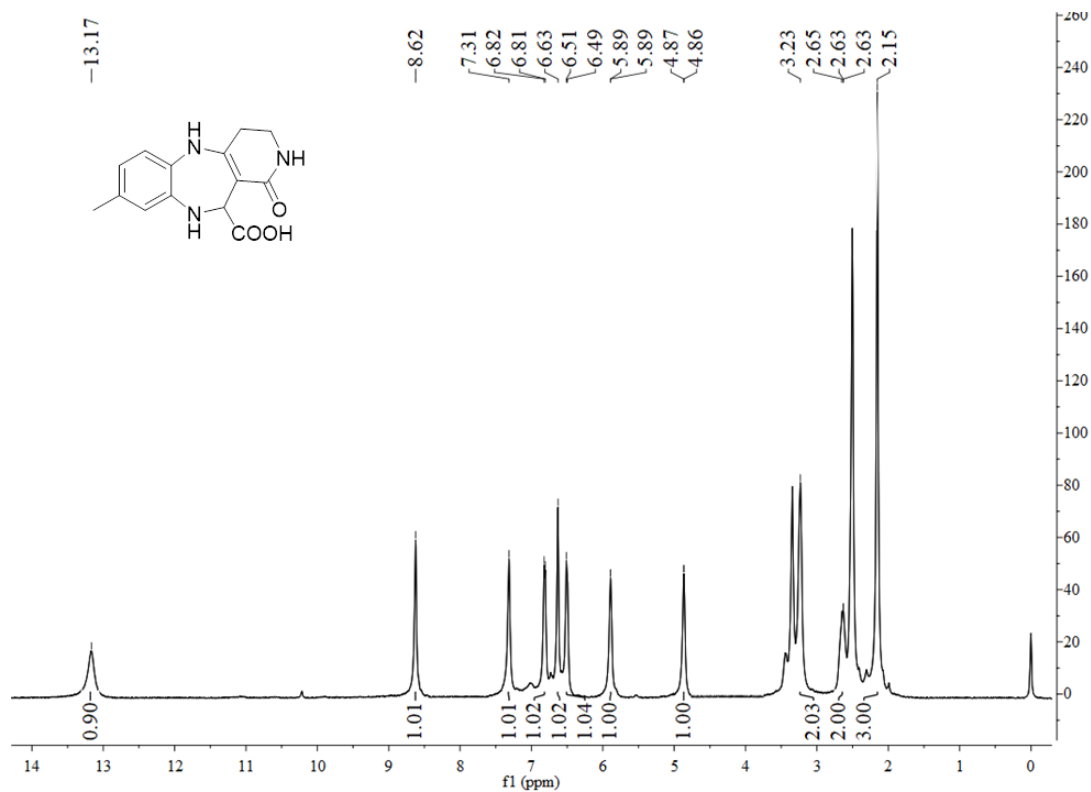

<sup>1</sup>H NMR spectra of compound 4bae

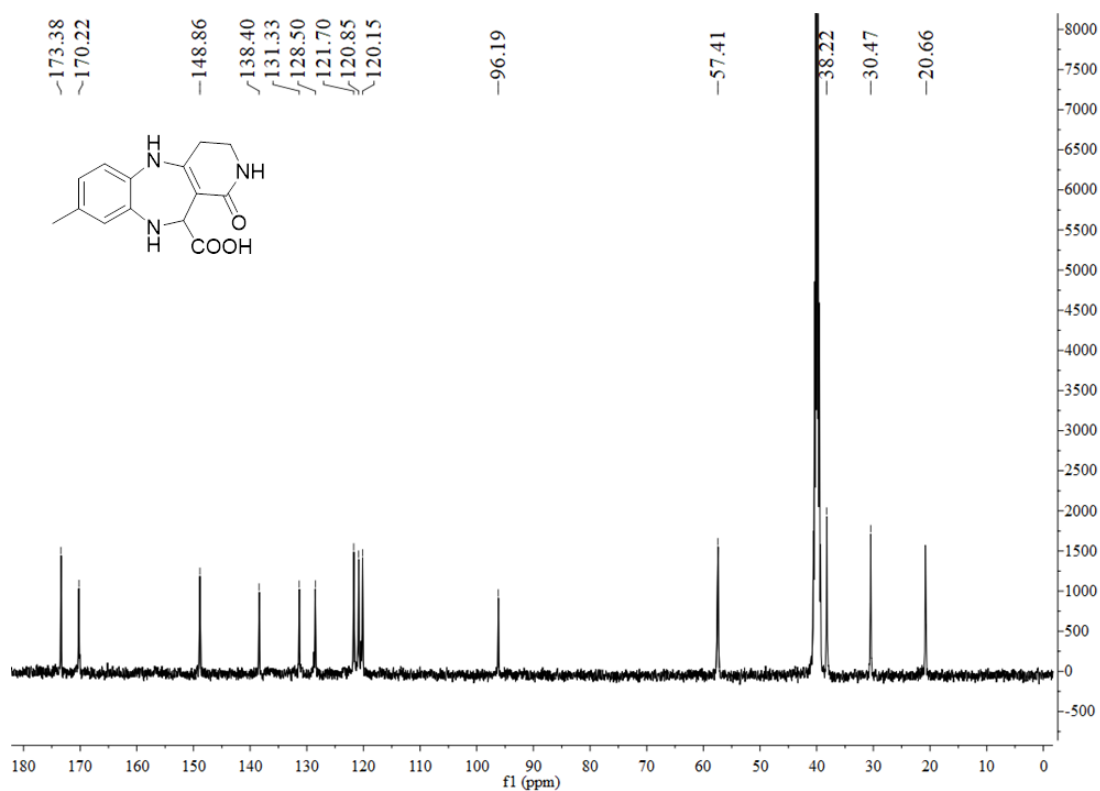

<sup>13</sup>C NMR spectra of compound 4bae

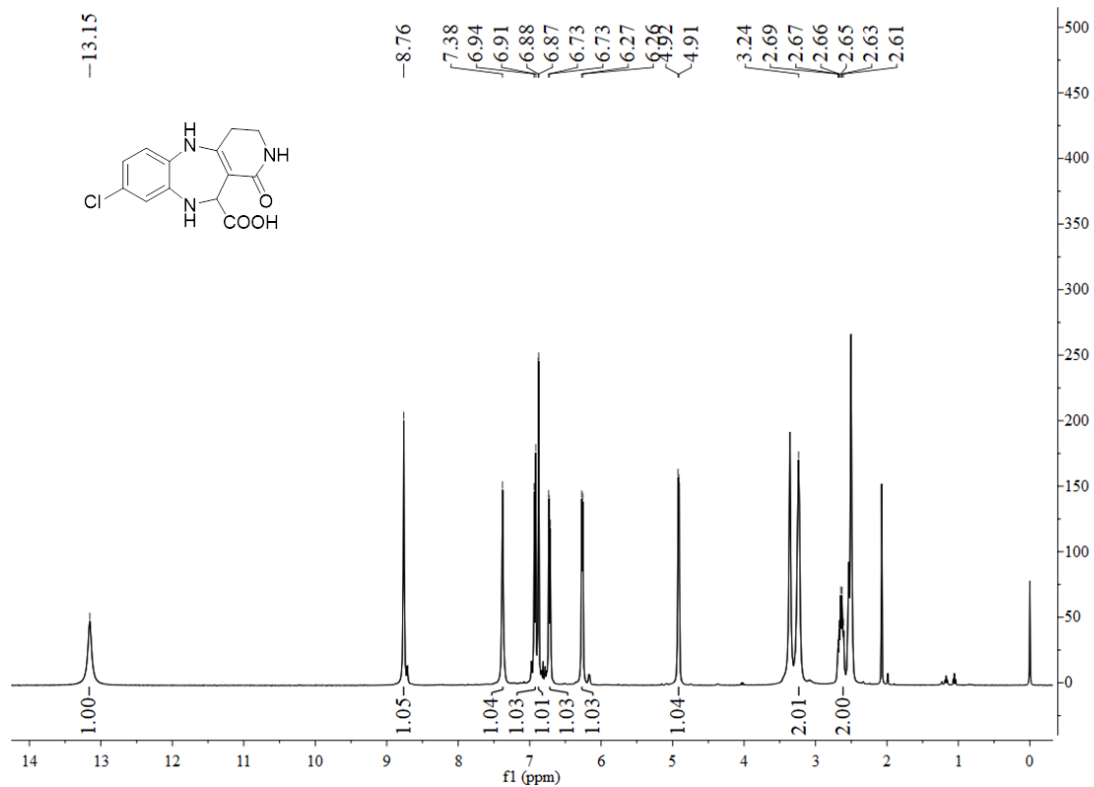

<sup>1</sup>H NMR spectra of compound **4cae**

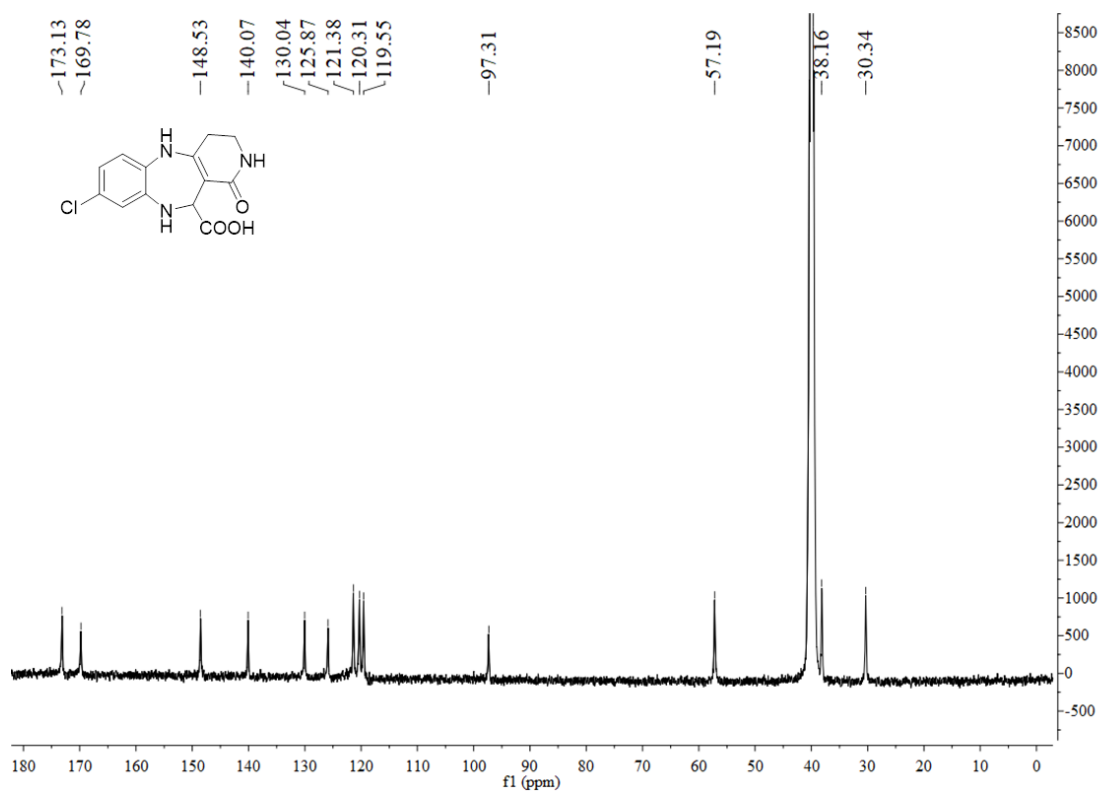

<sup>13</sup>C NMR spectra of compound **4cae**

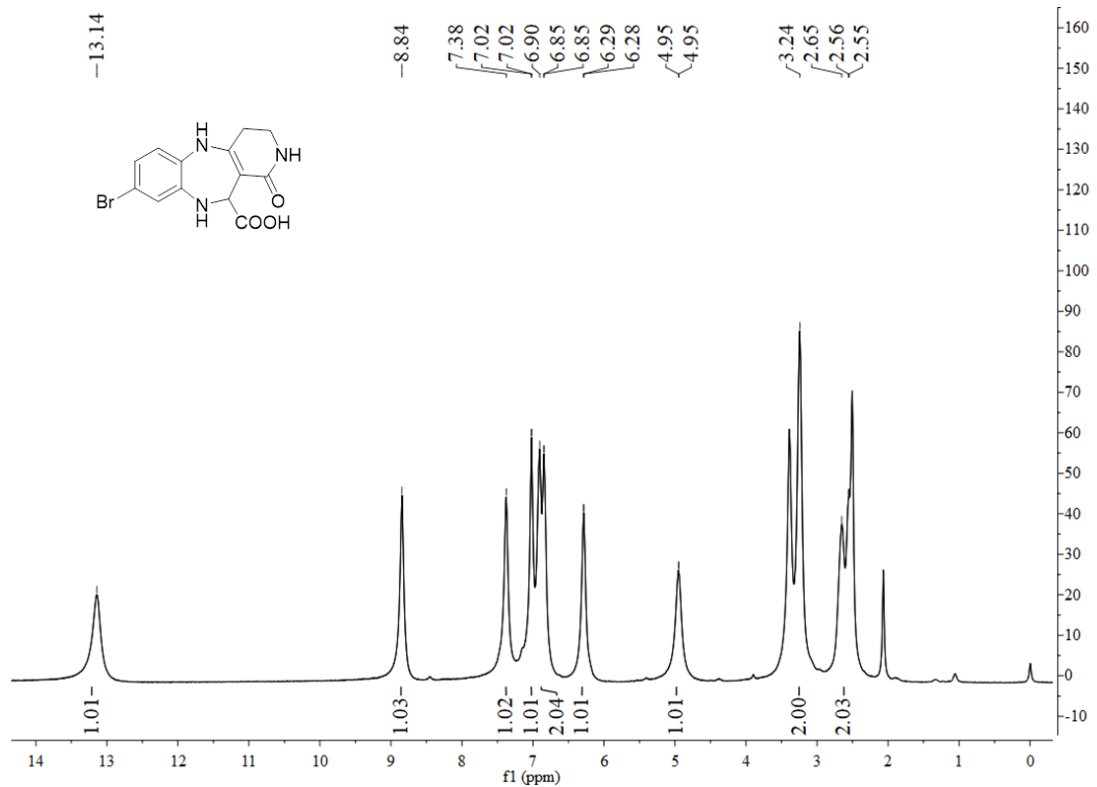

<sup>1</sup>H NMR spectra of compound 4dae

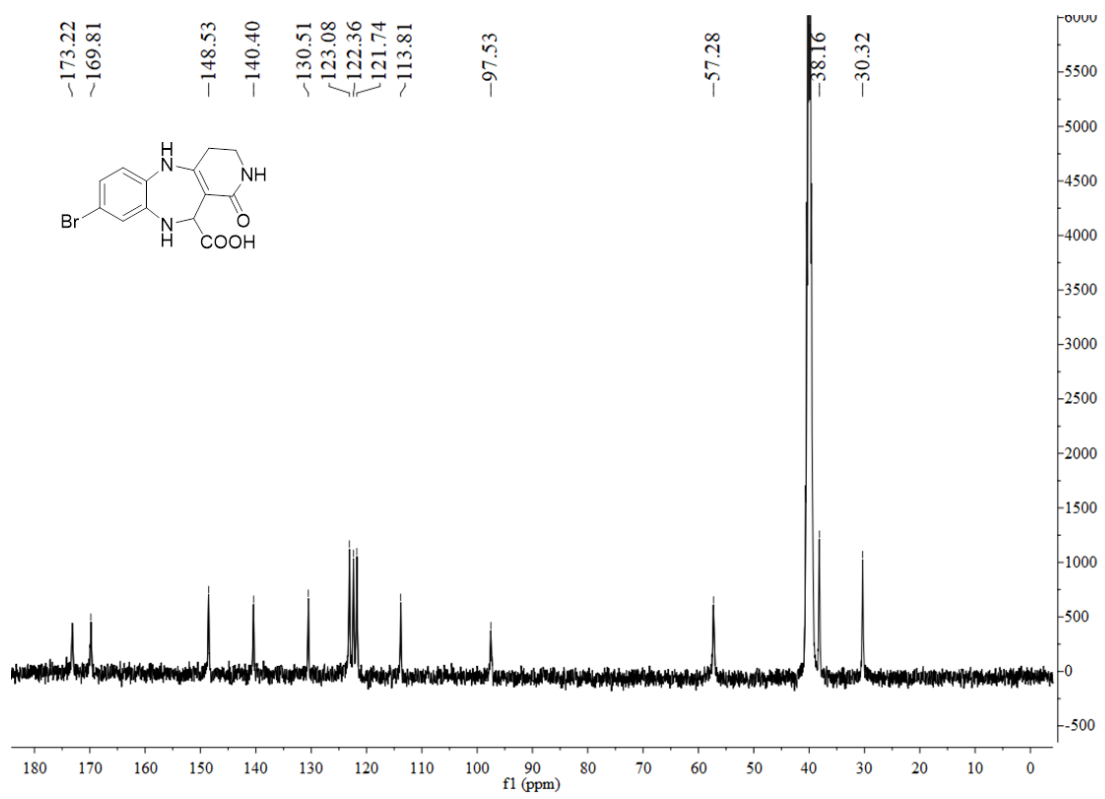

<sup>13</sup>C NMR spectra of compound 4dae

IR spectra of the synthesized compound **4aaa-4dae**

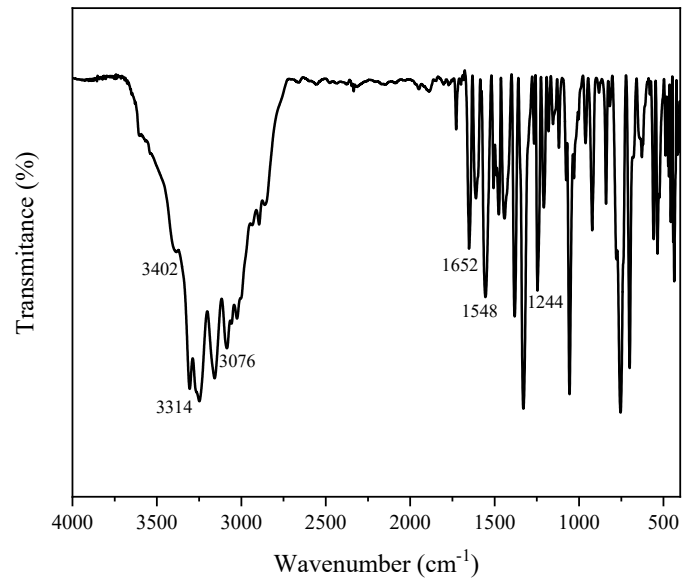

IR spectra of compound **4aaa**

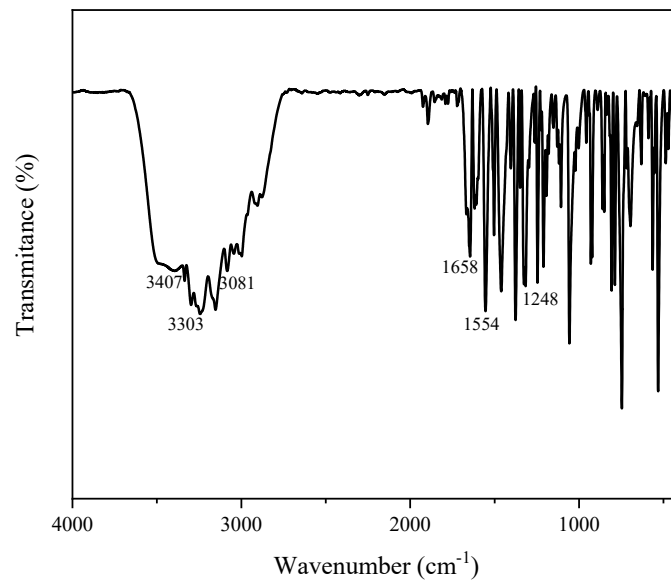

IR spectra of compound **4aab**

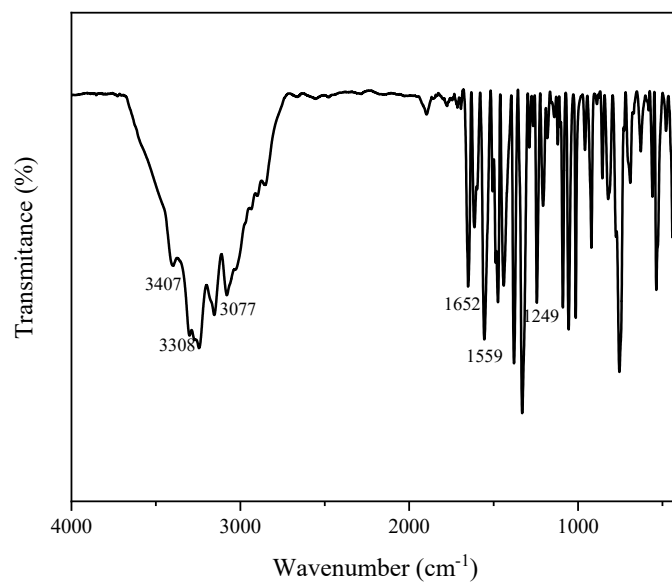

IR spectra of compound **4aac**

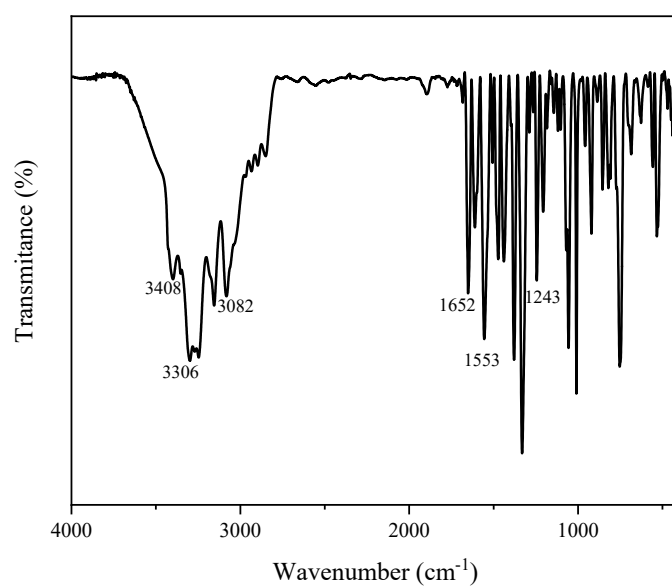

IR spectra of compound **4aad**



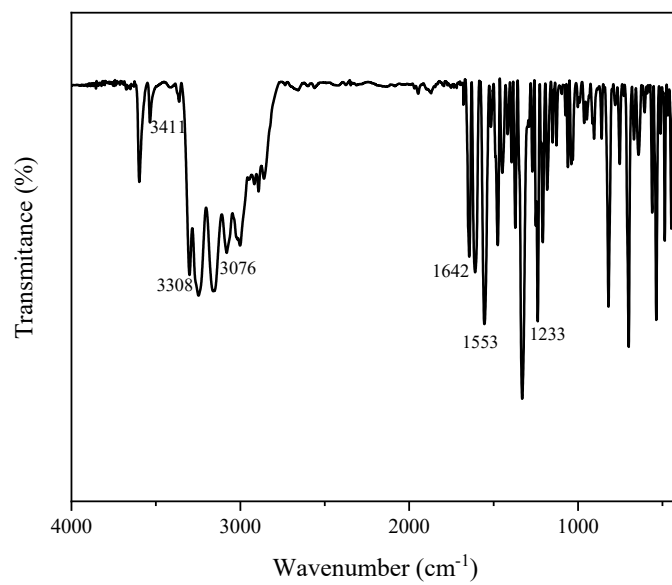

IR spectra of compound **4baa**

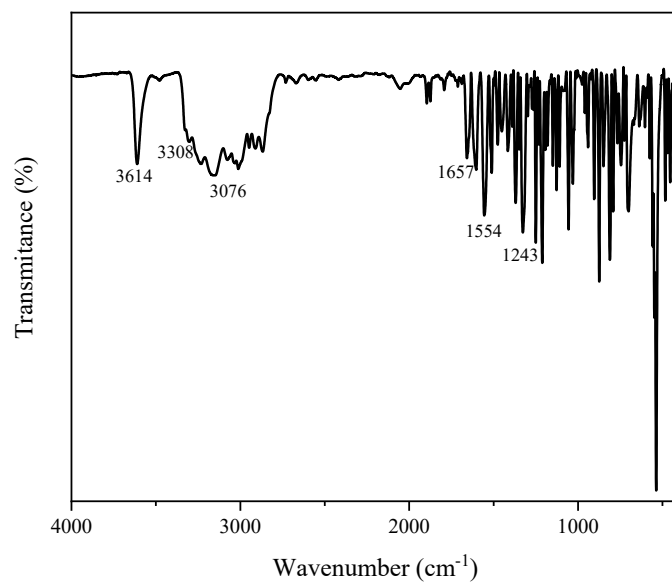

IR spectra of compound **4bab**

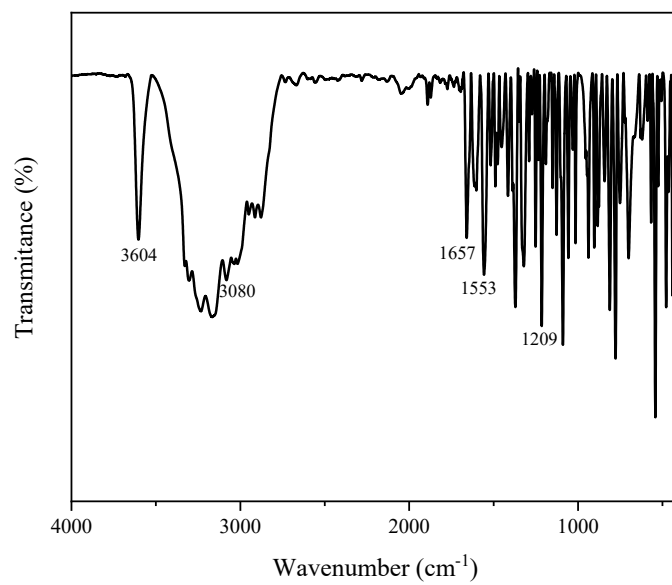

IR spectra of compound **4bac**

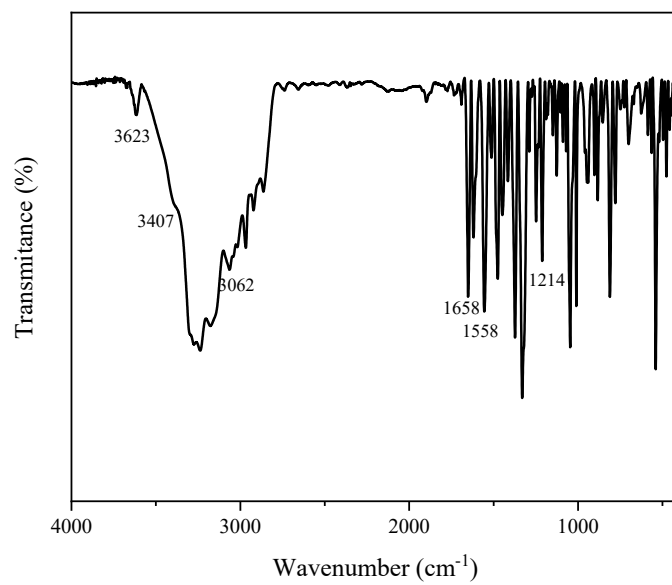

IR spectra of compound **4bad**

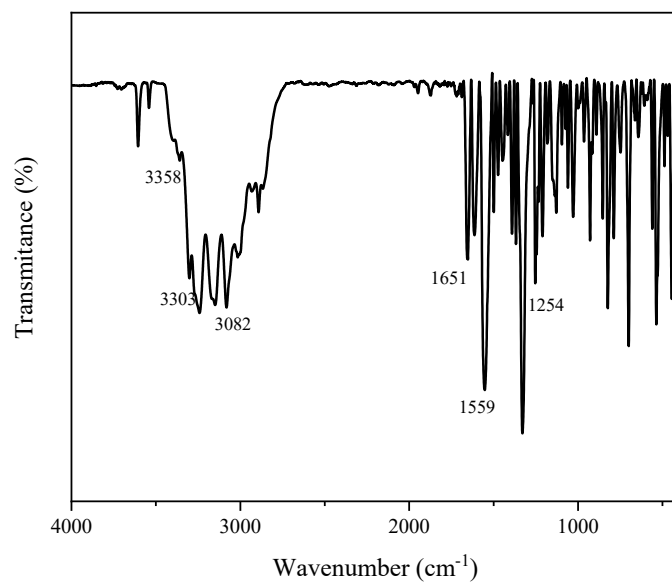

IR spectra of compound **4caa**

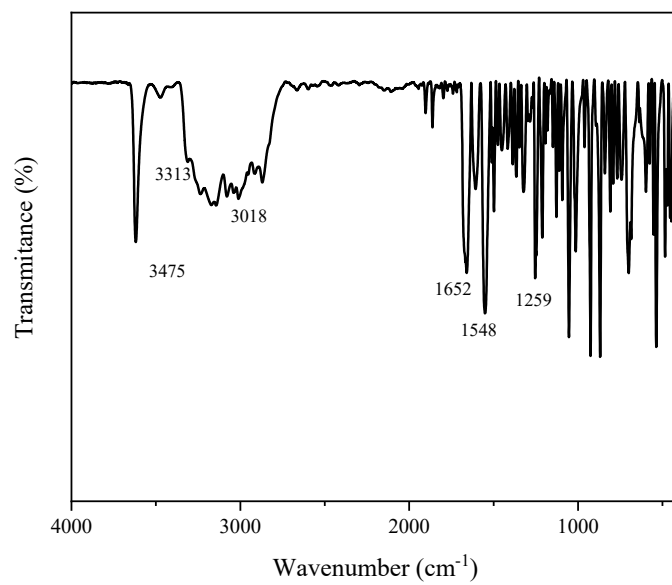

IR spectra of compound **4cab**

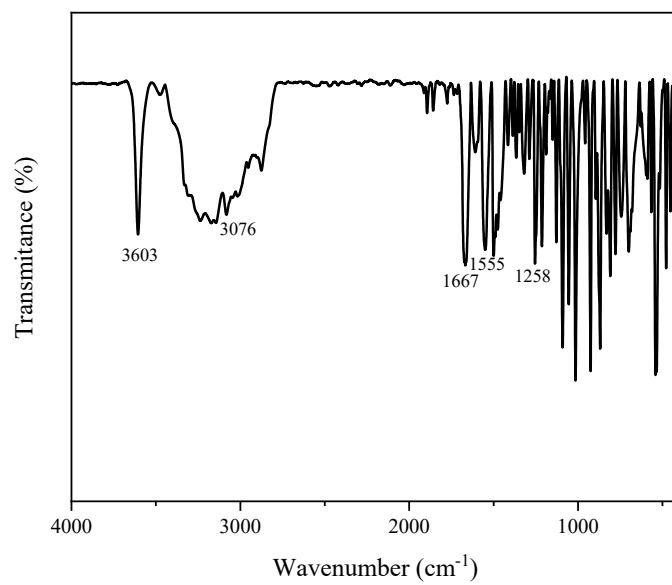

IR spectra of compound **4cac**

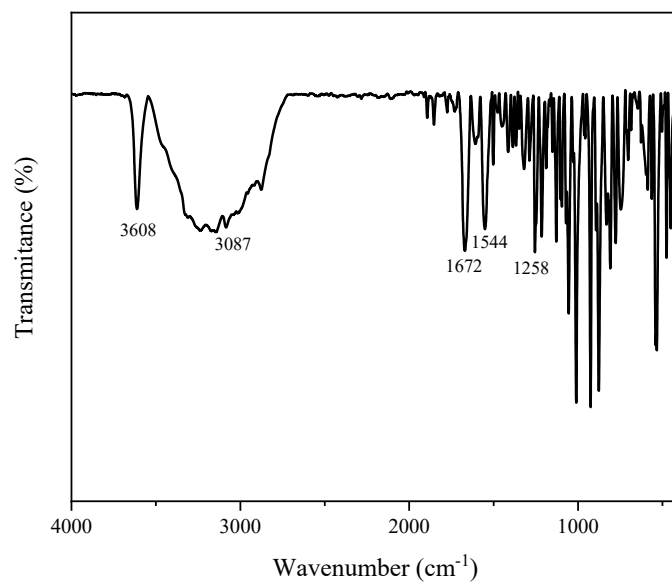

IR spectra of compound **4cad**

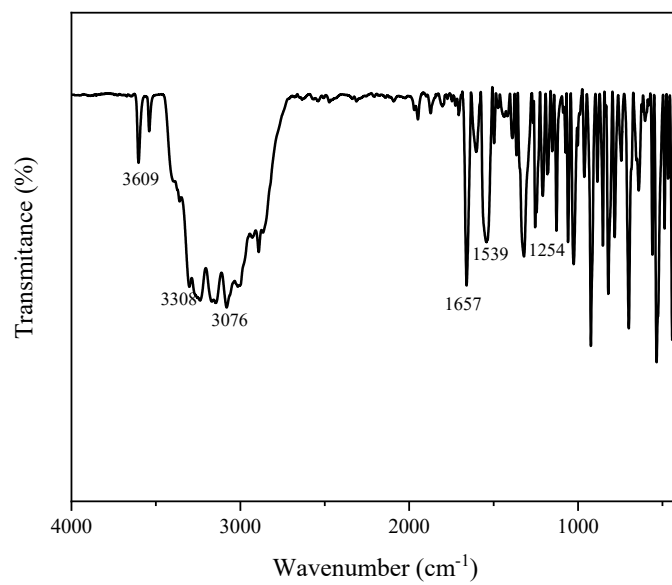

IR spectra of compound **4daa**

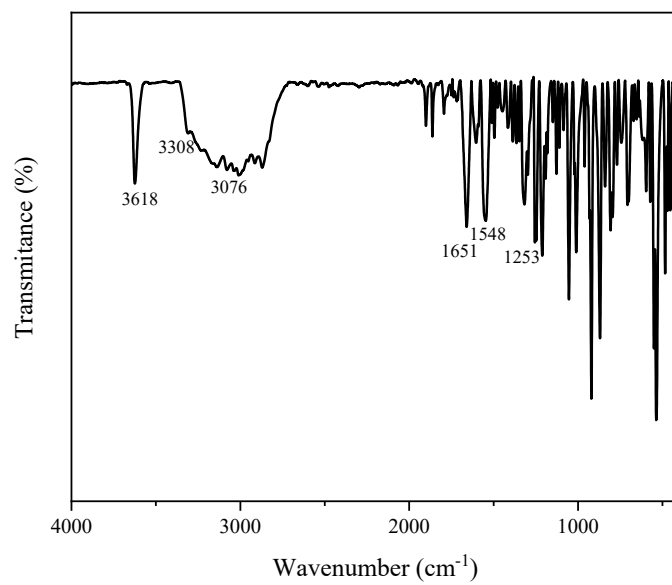

IR spectra of compound **4dab**

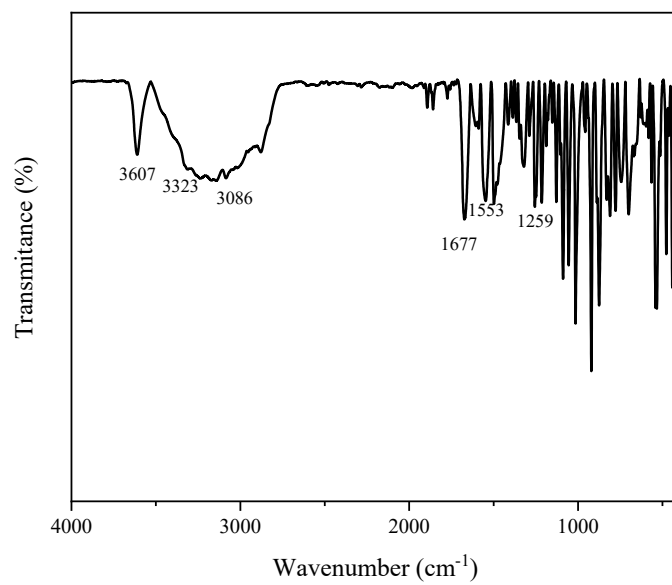

IR spectra of compound **4dac**

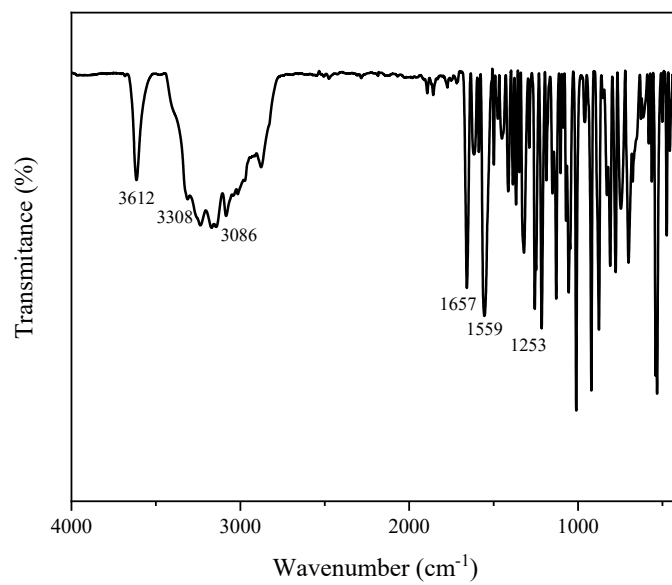

IR spectra of compound **4dad**

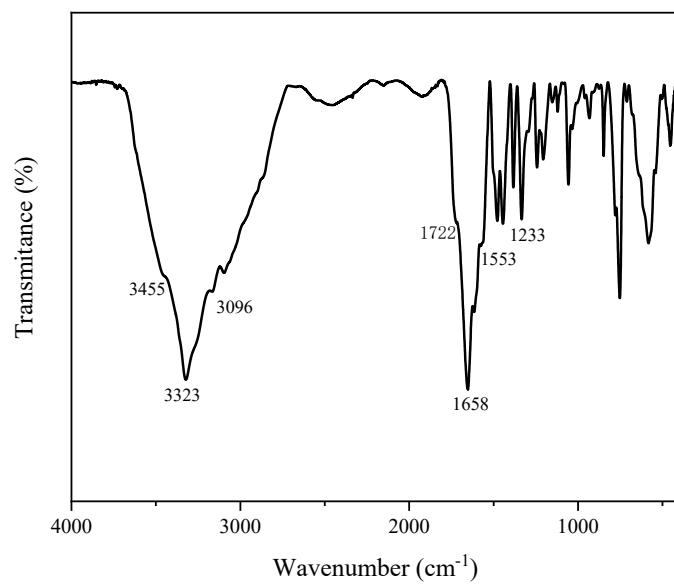

IR spectra of compound **4aae**

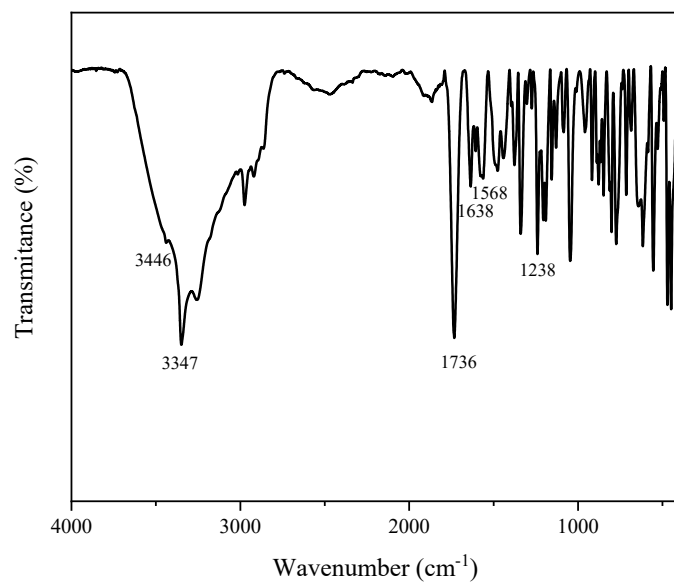

IR spectra of compound **4bae**

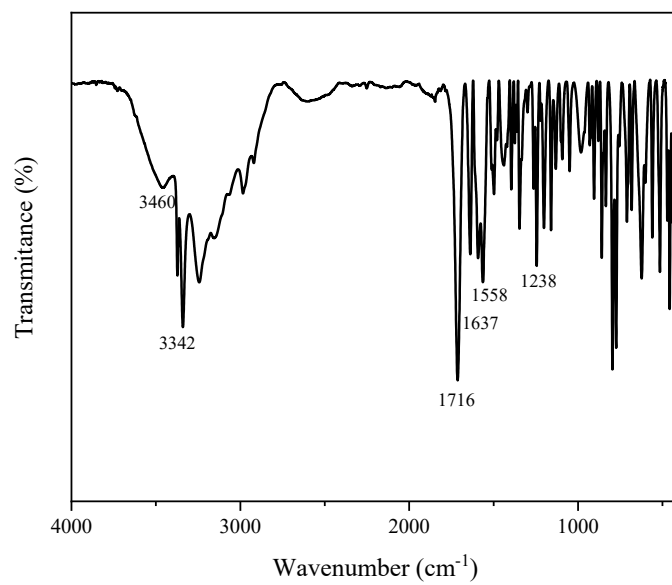

IR spectra of compound **4cae**

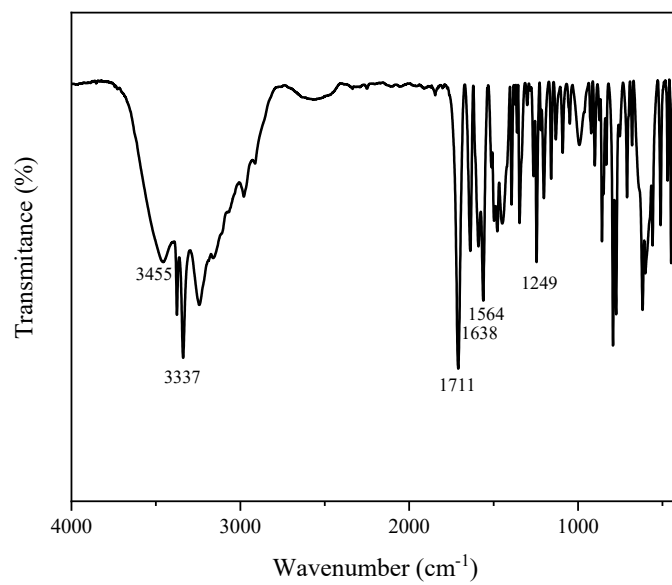

IR spectra of compound **4dae**



MS spectra of the synthesized compound **4aaa-4dae**

MS of compound **4aaa**

MS of compound **4aab**

MS of compound **4aac**

MS of compound **4aad**

MS of compound **4baa**

MS of compound **4bab**

MS of compound **4bac**

MS of compound **4bad**

MS of compound **4ca**

MS of compound **4cb**

MS of compound **4cac**

MS of compound **4cad**

MS of compound **4daa**

MS of compound **4dab**

MS of compound **4dac**

MS of compound **4dad**



MS of compound **4aae**

MS of compound **4bae**

MS of compound **4cae**

MS of compound **4dae**
